# Supplementary figures and images for: Gene delivery agents possessing antiradical activity: self-assembling cationic amphiphilic 1,4-dihydropyridine derivatives
Source: Royal Society of Chemistry journal article supplement (doi:10.1039/c3nj00272a), 2013-01-01

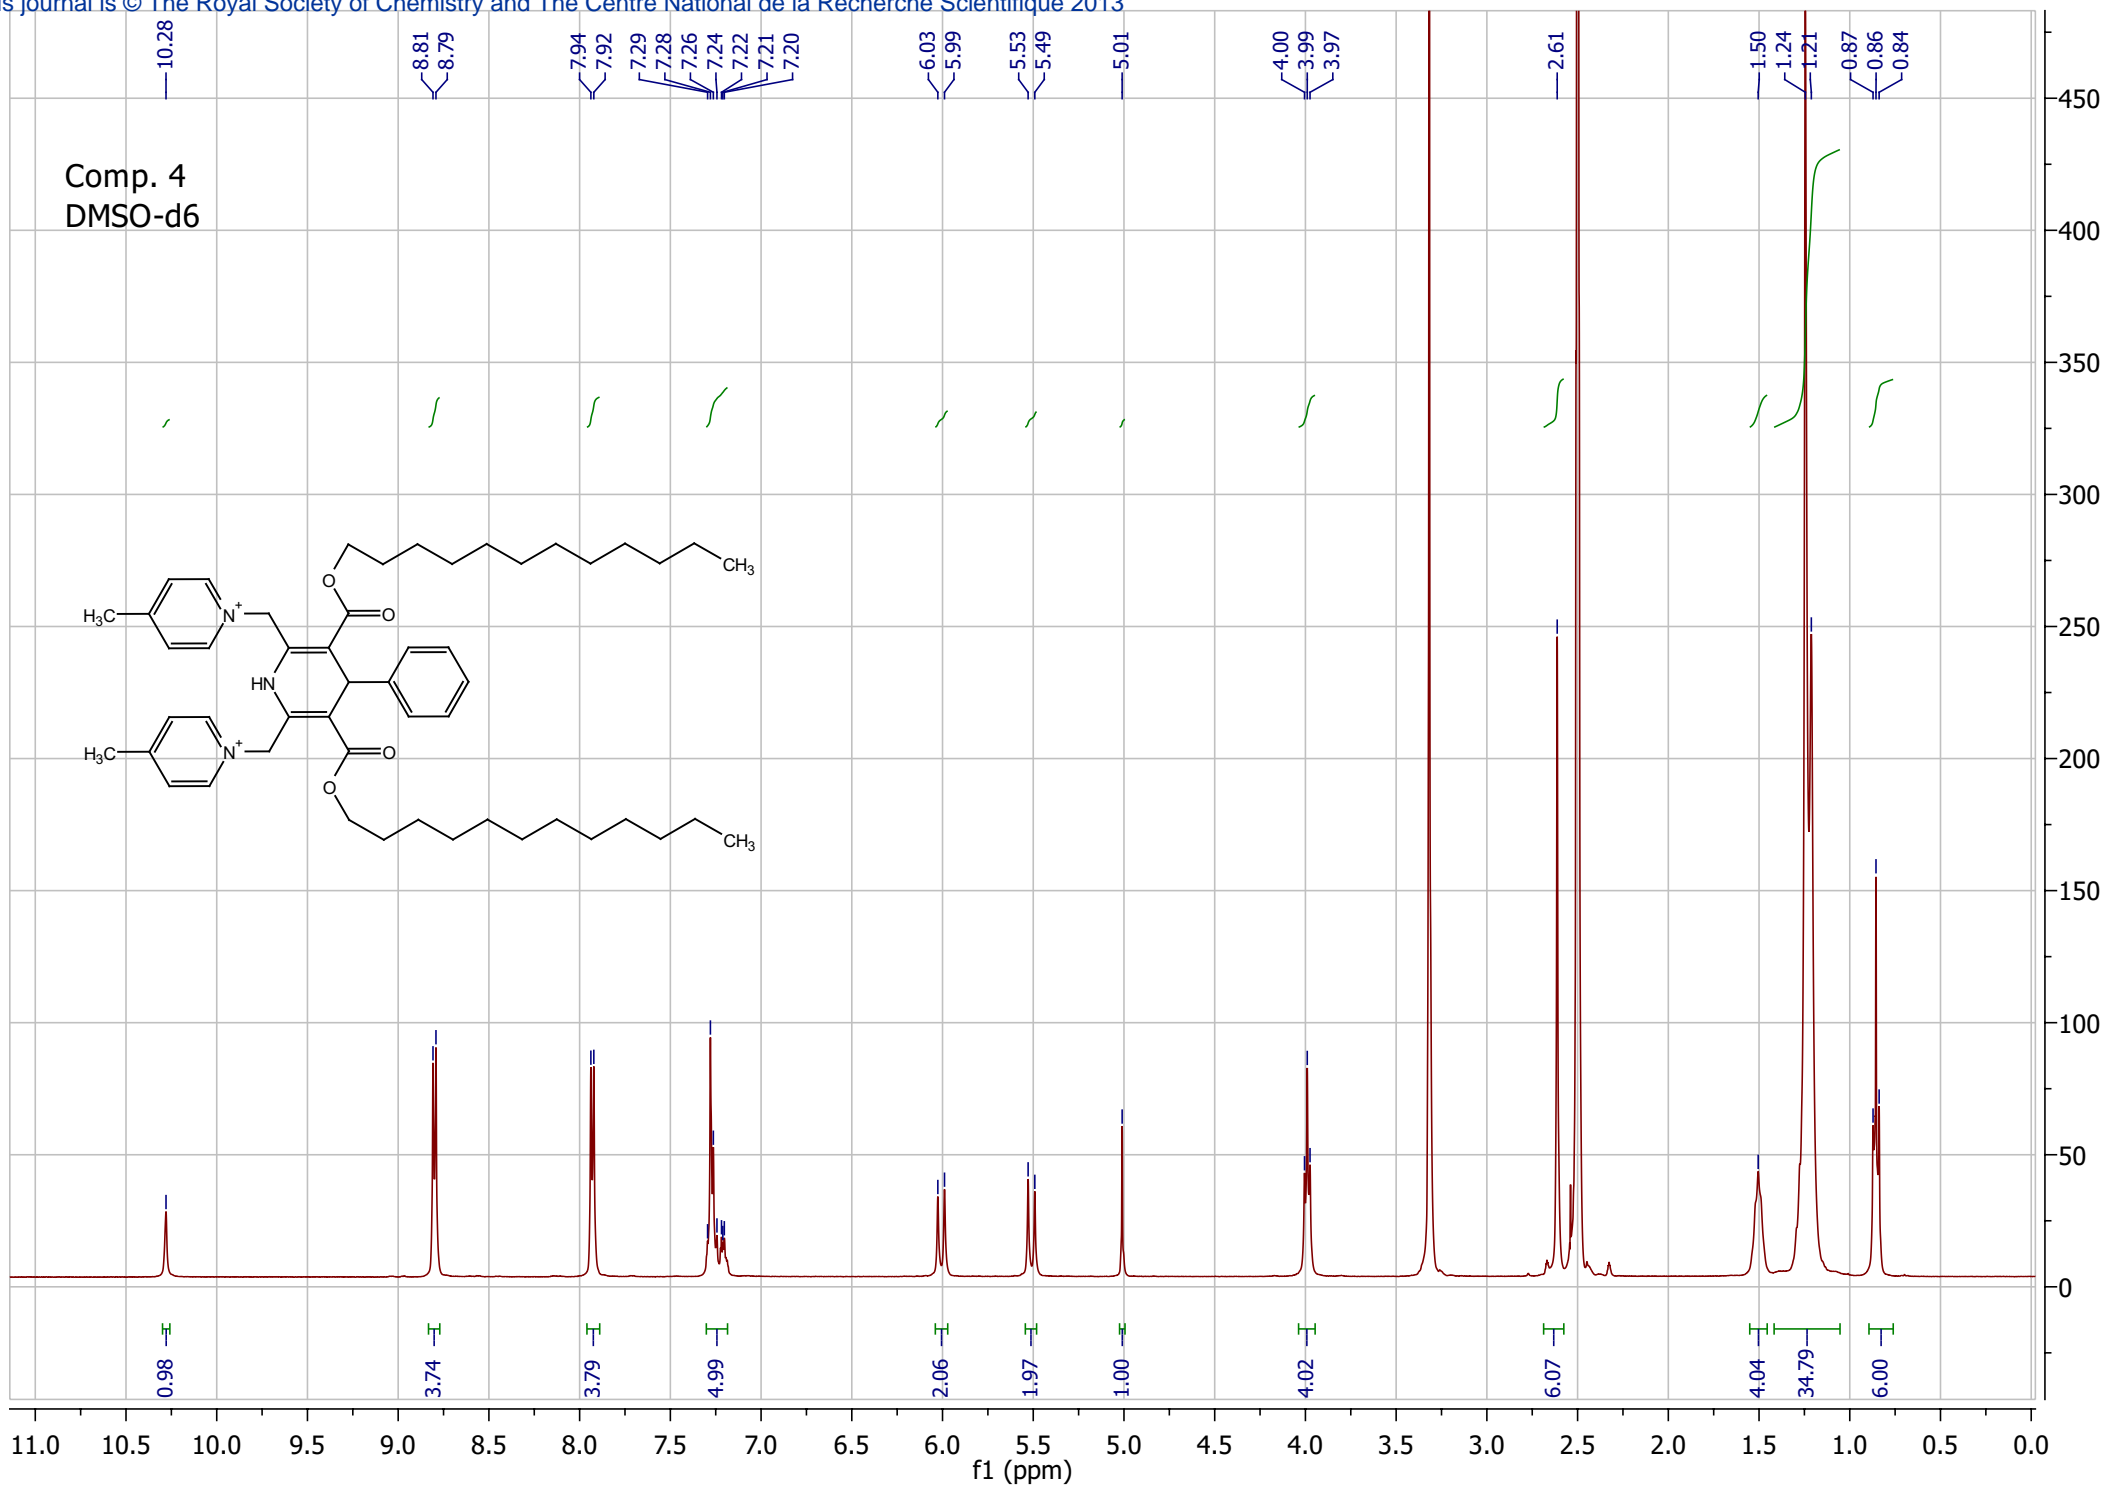

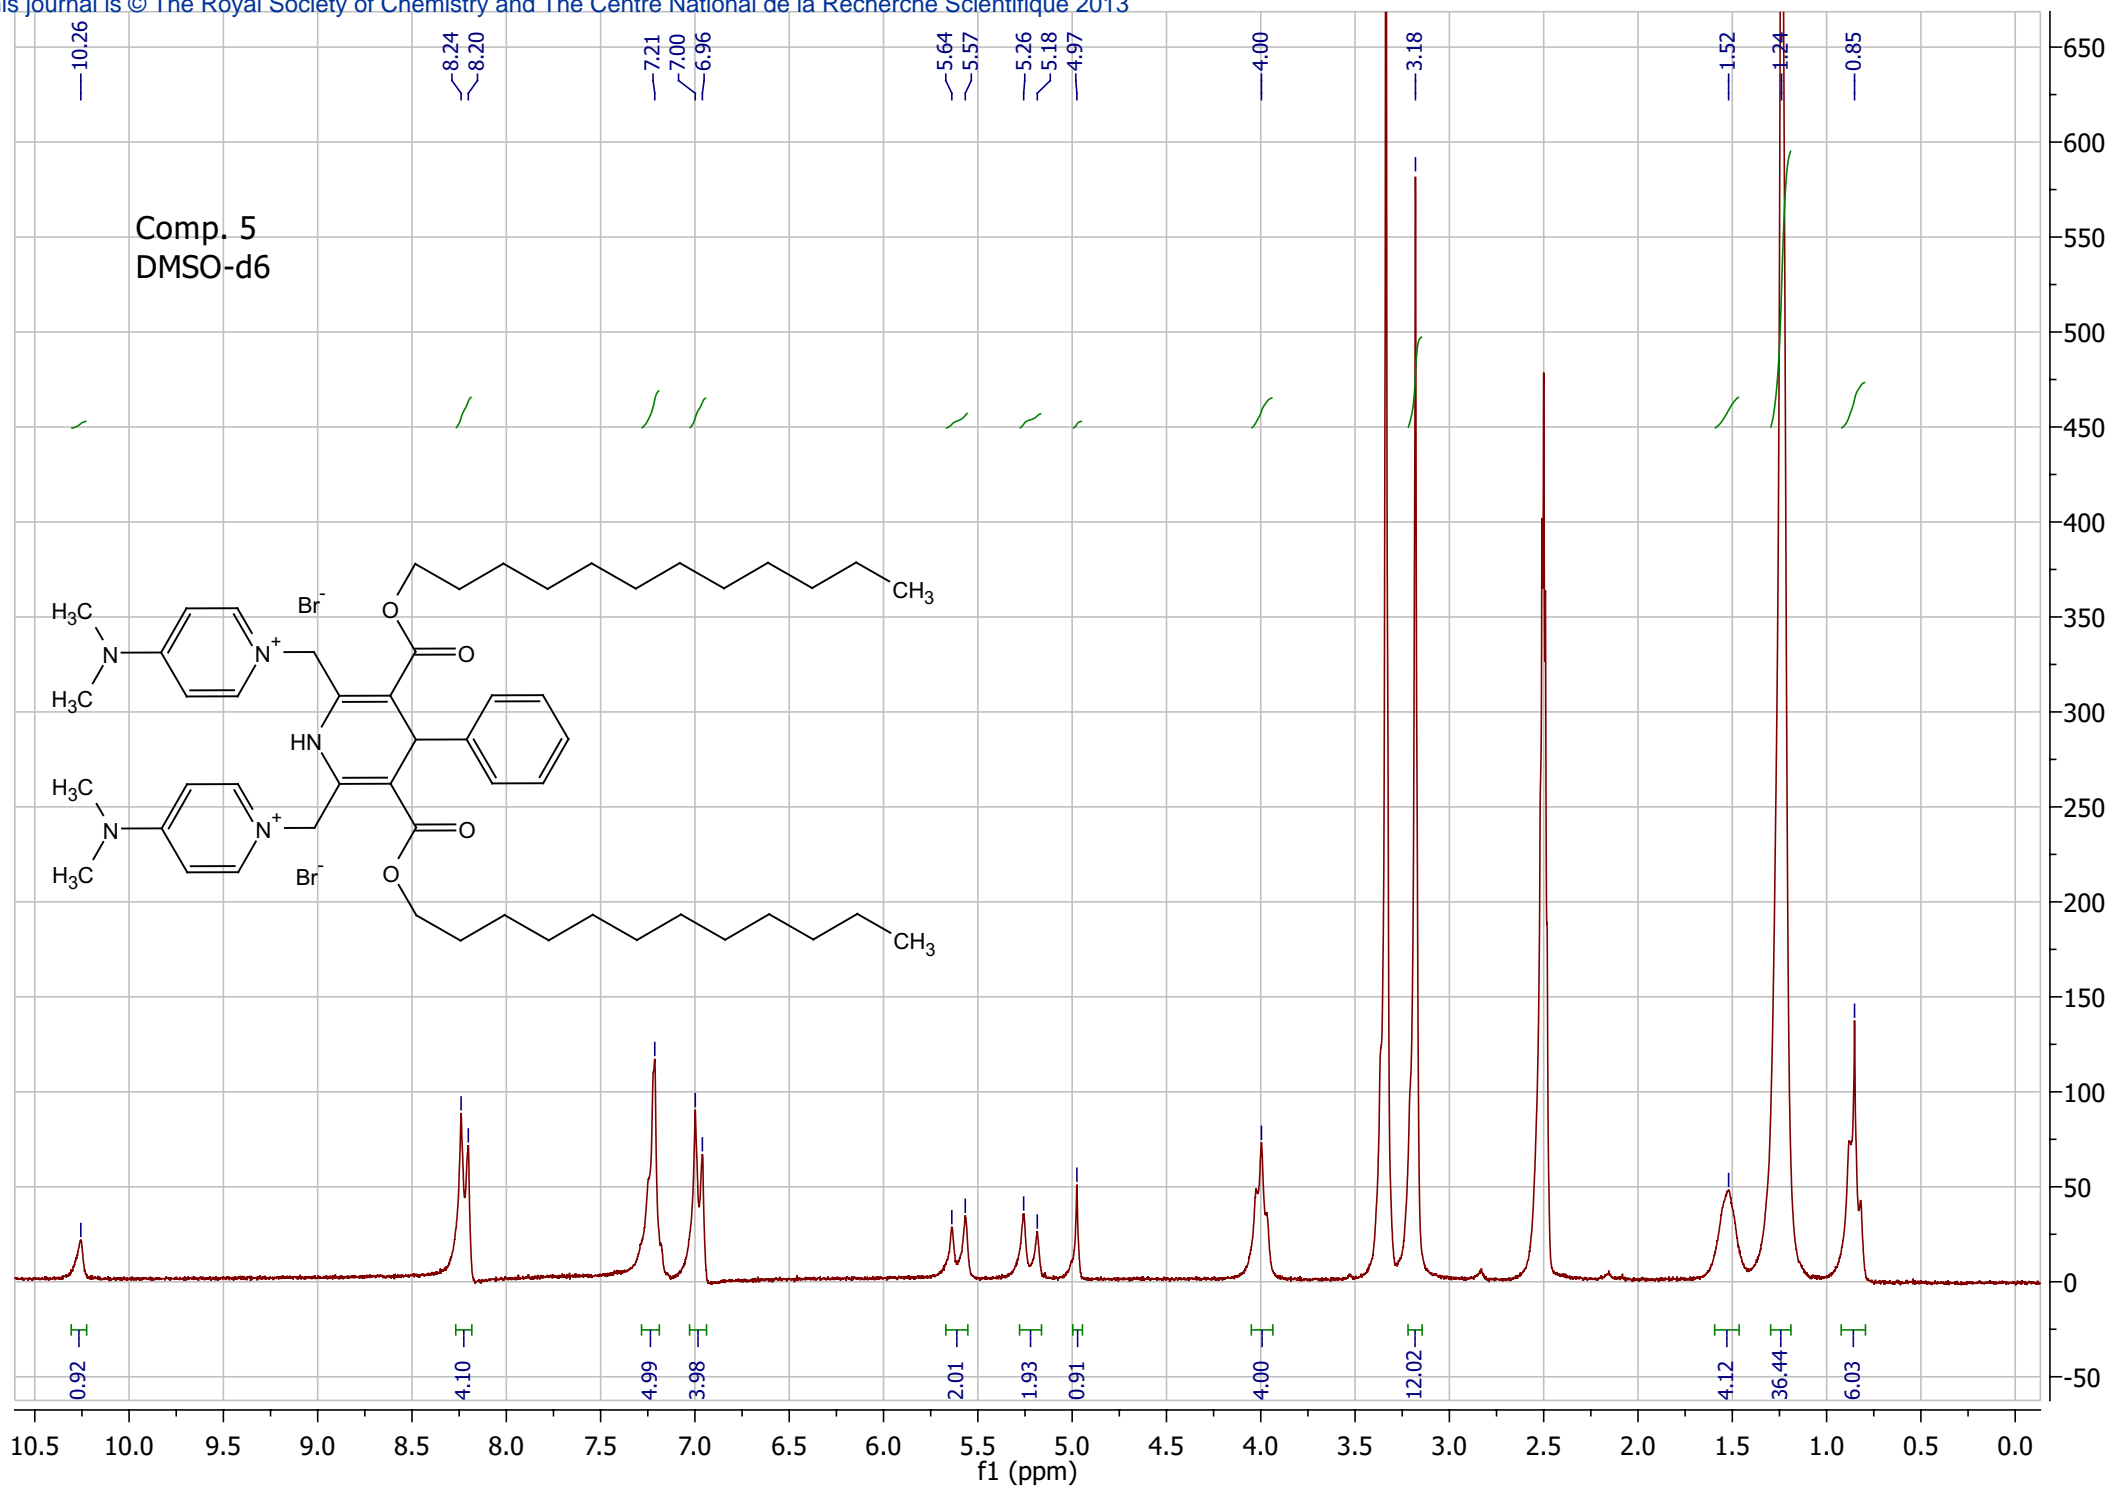

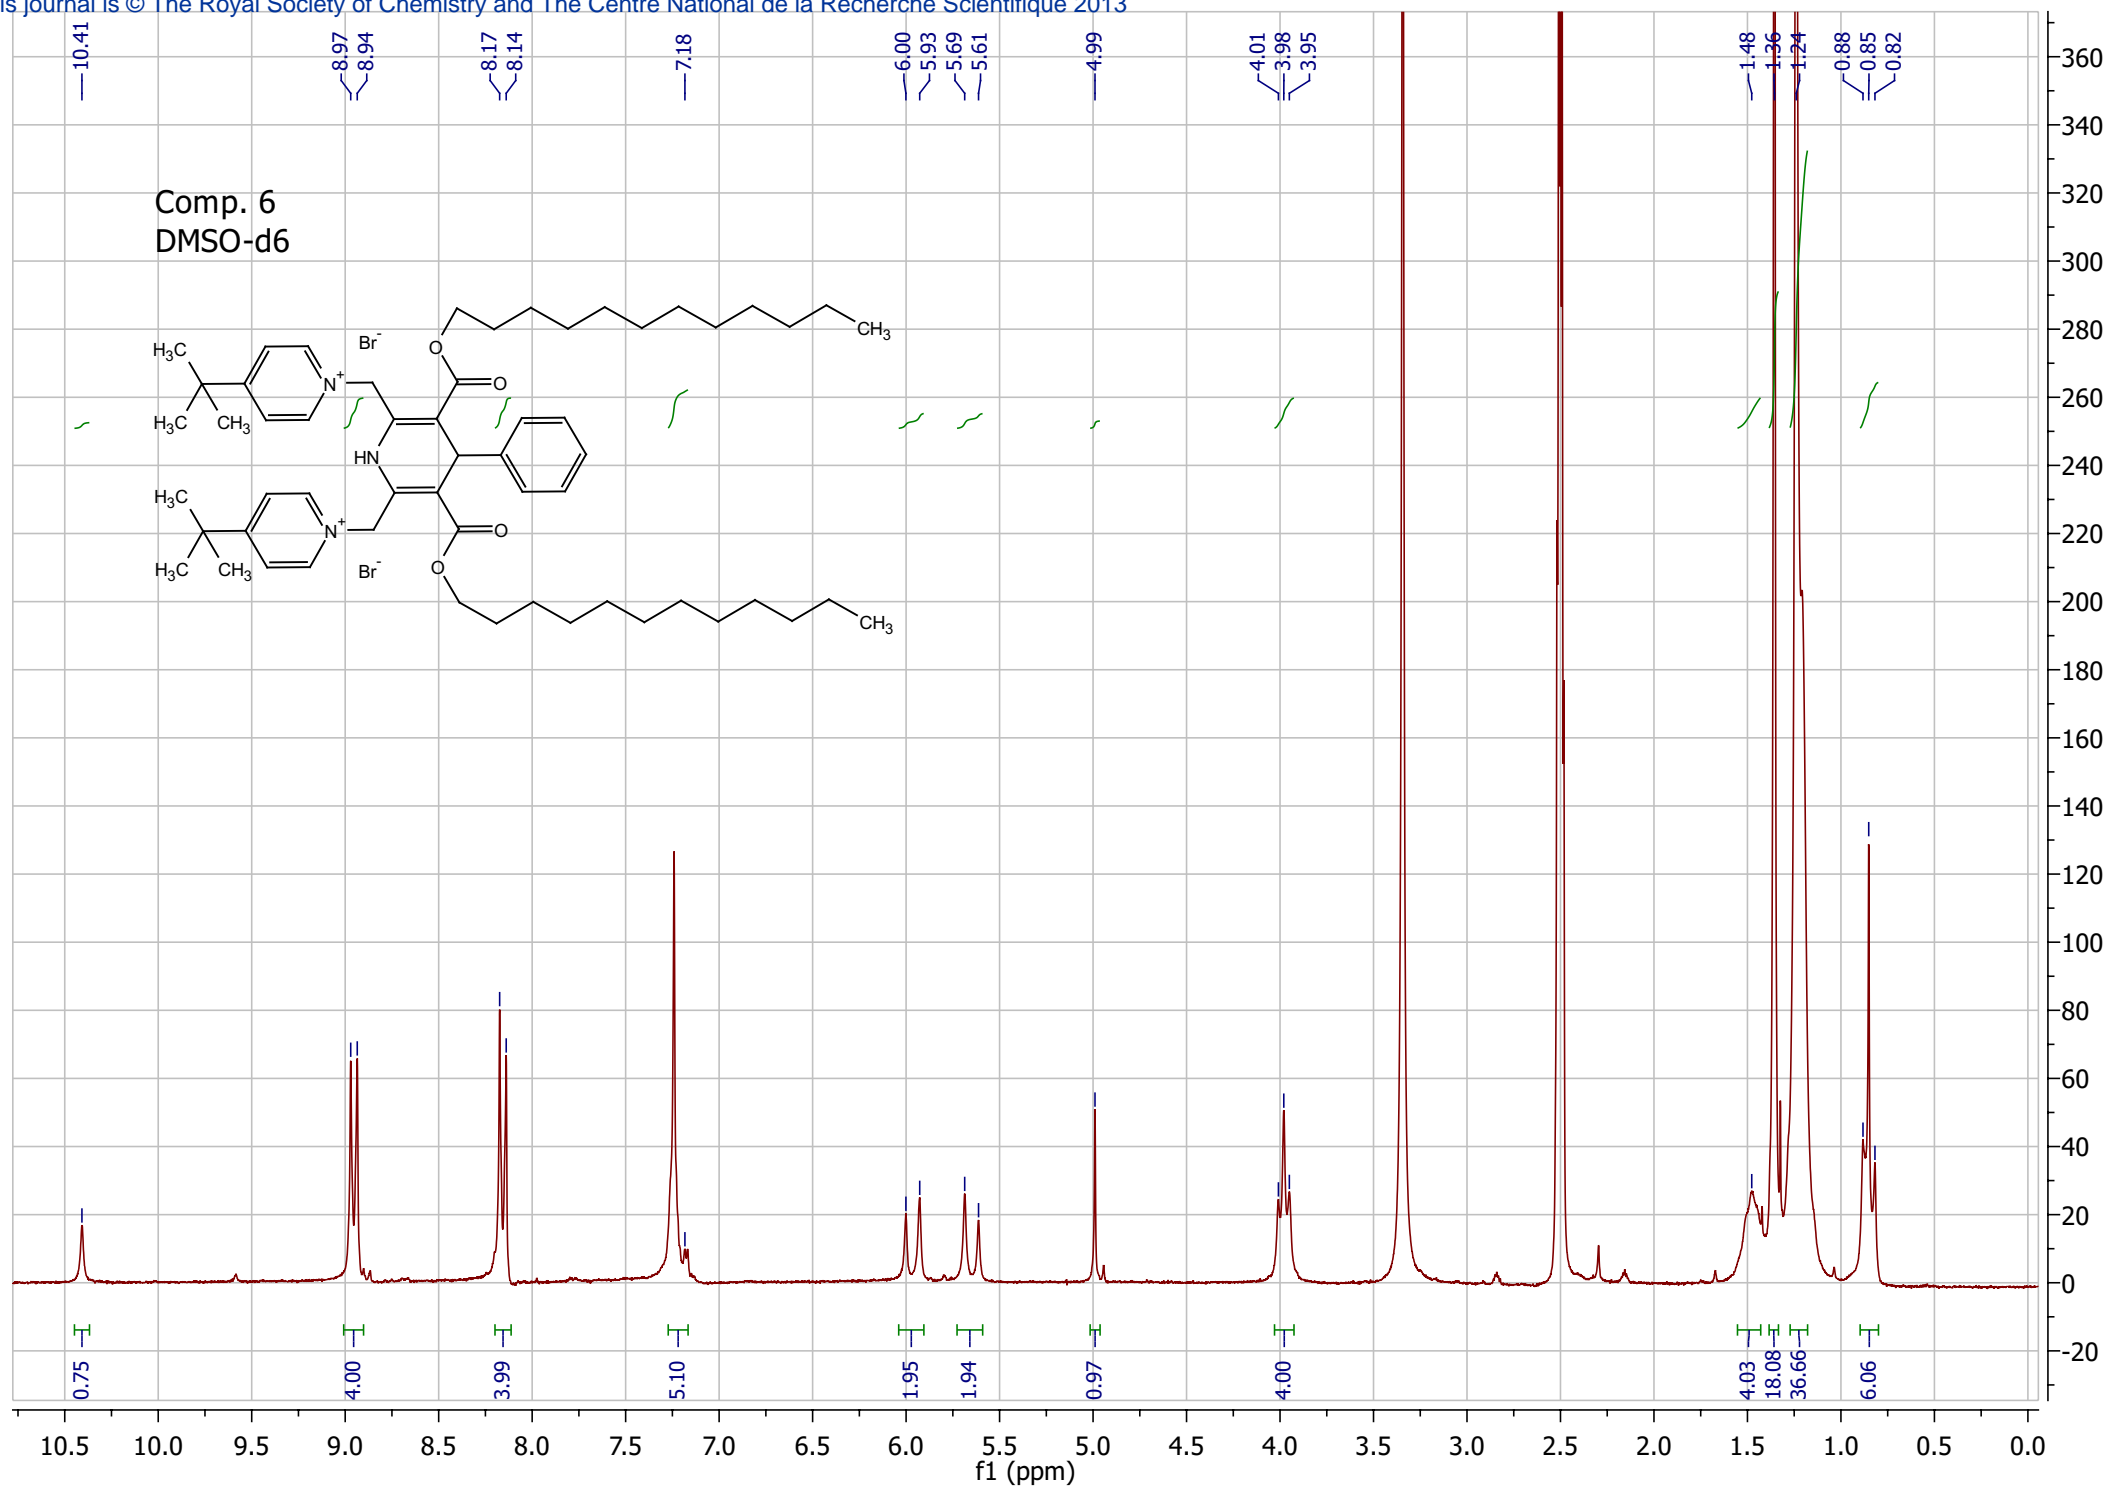

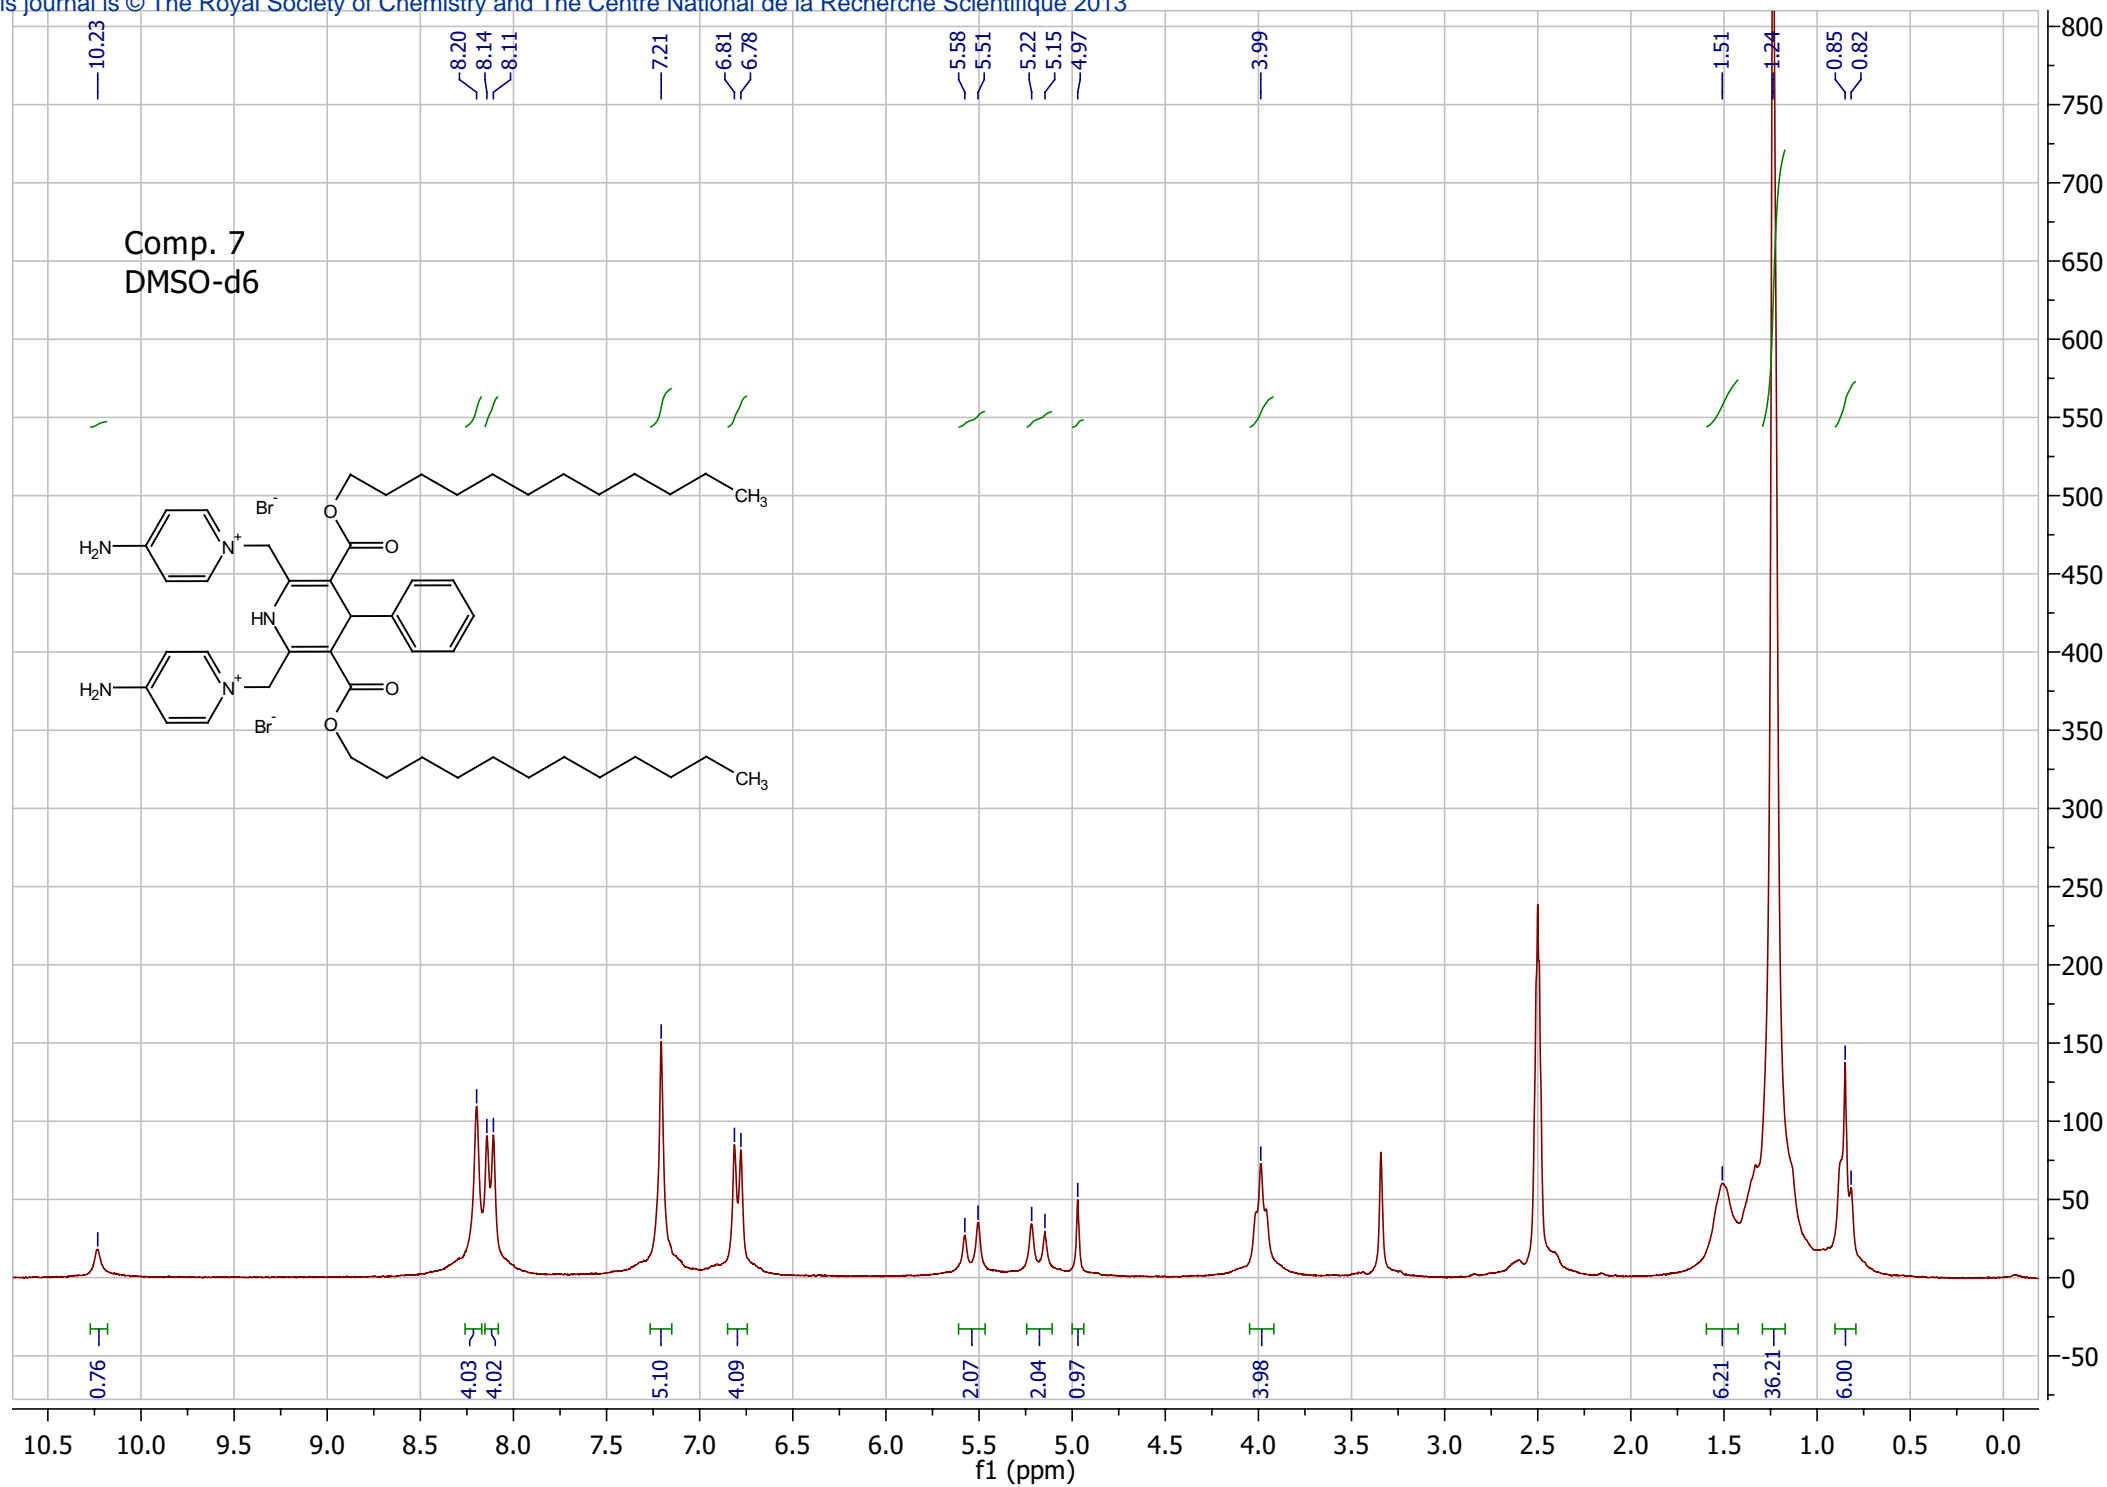

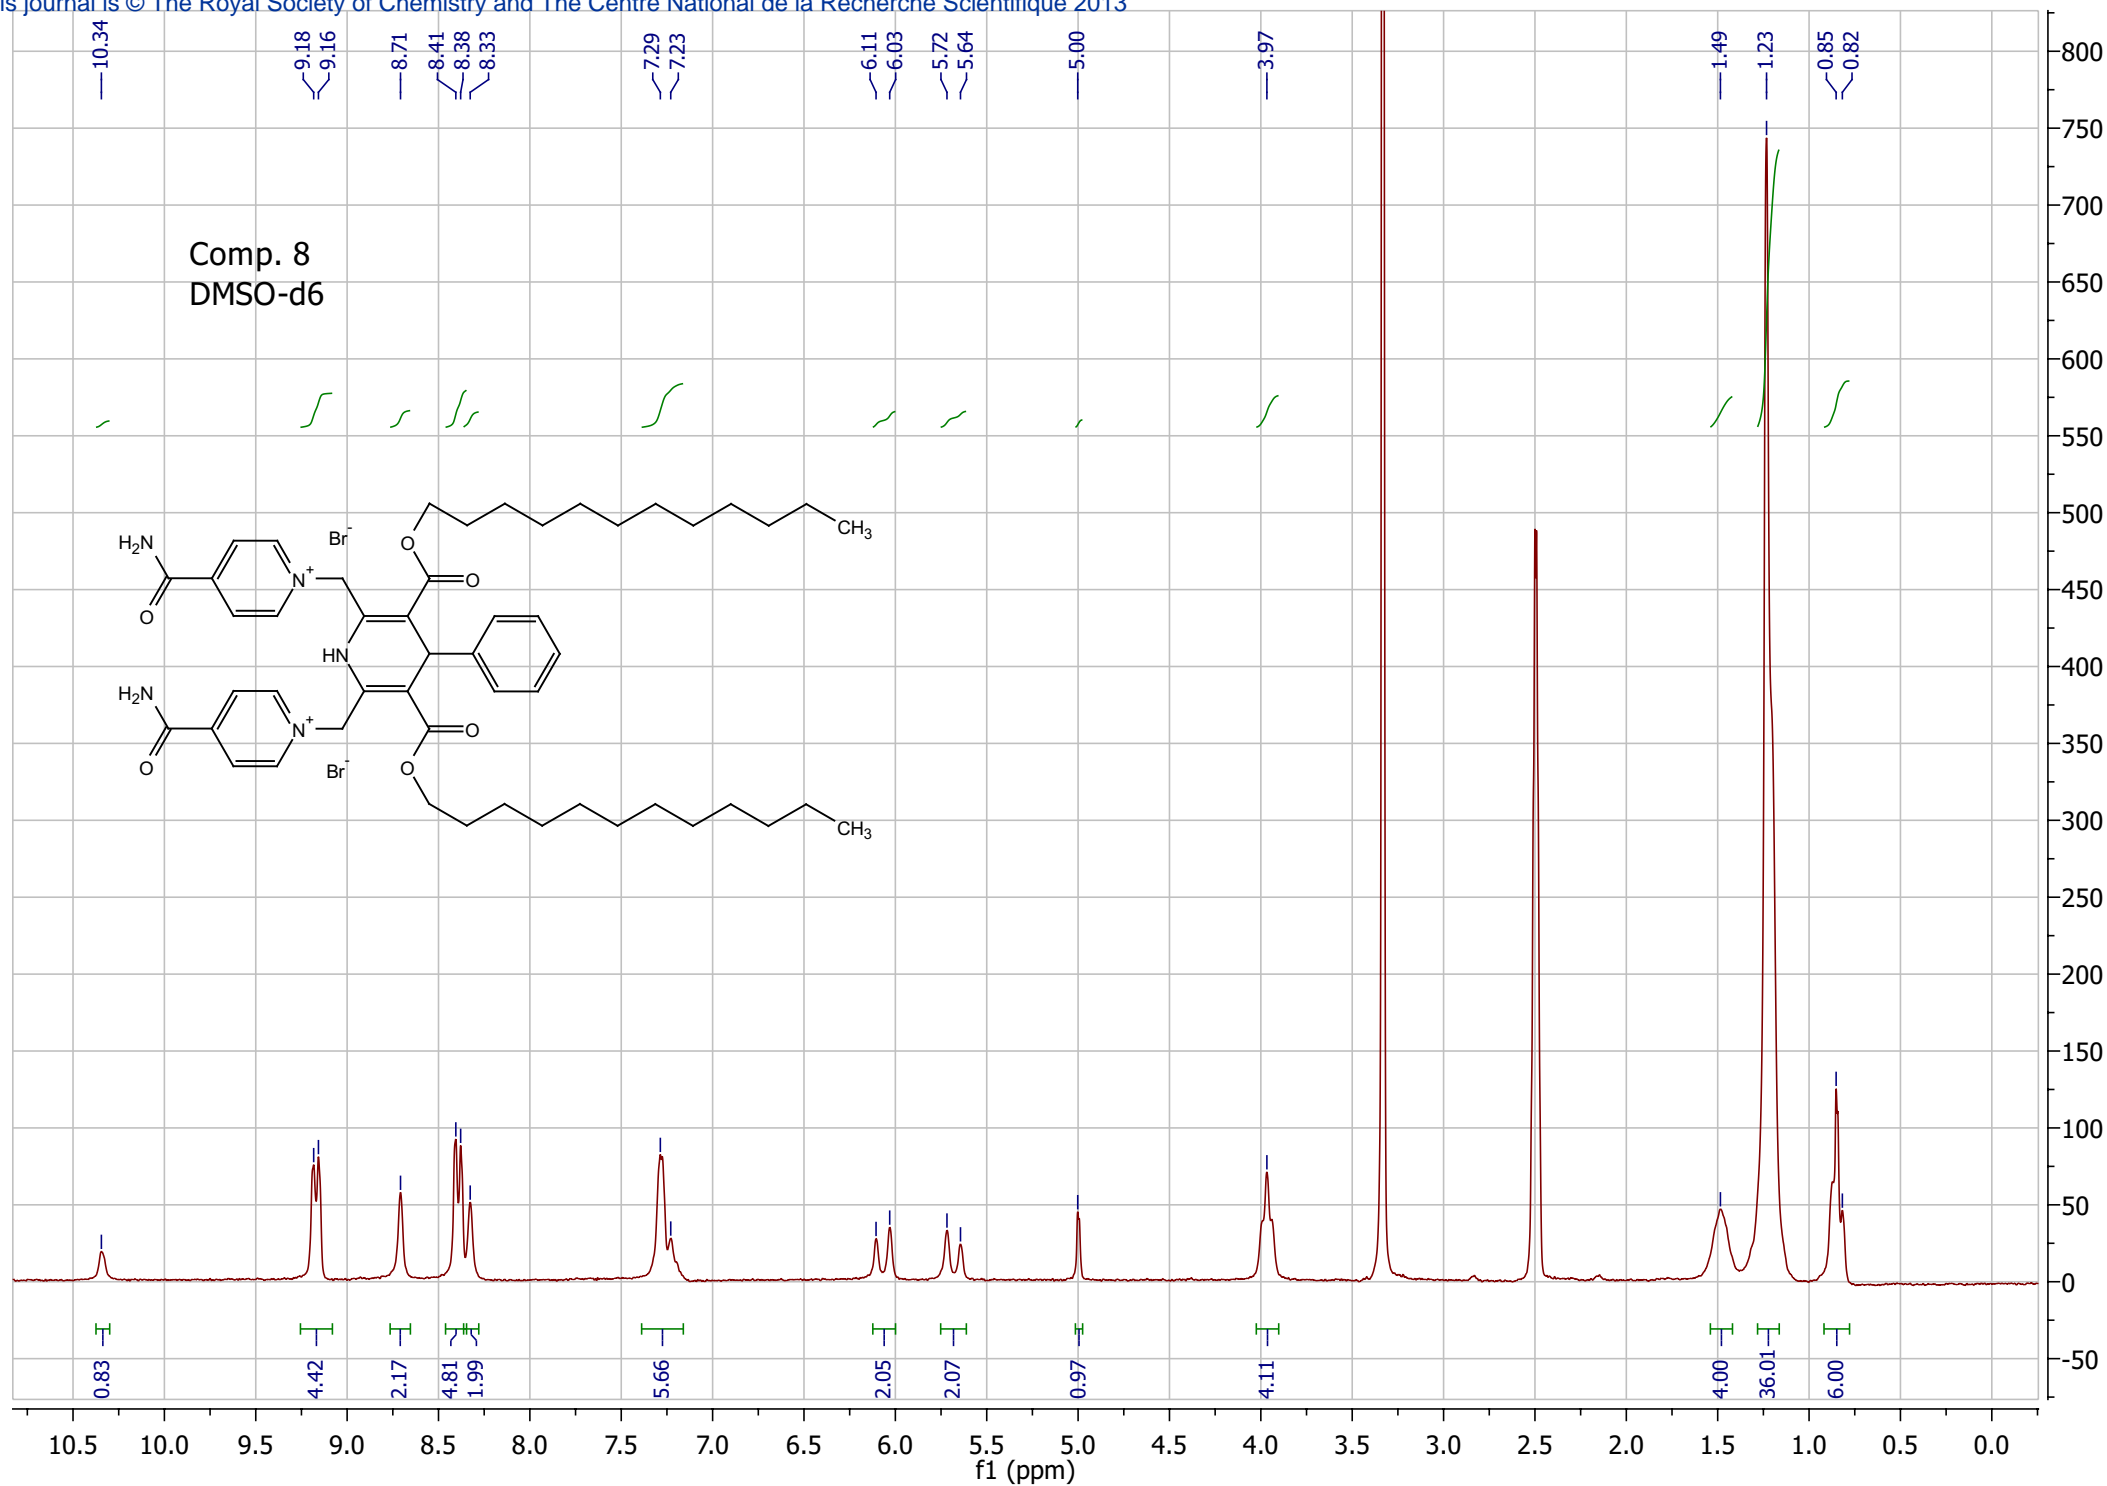

Comp. 9  
DMSO-d6

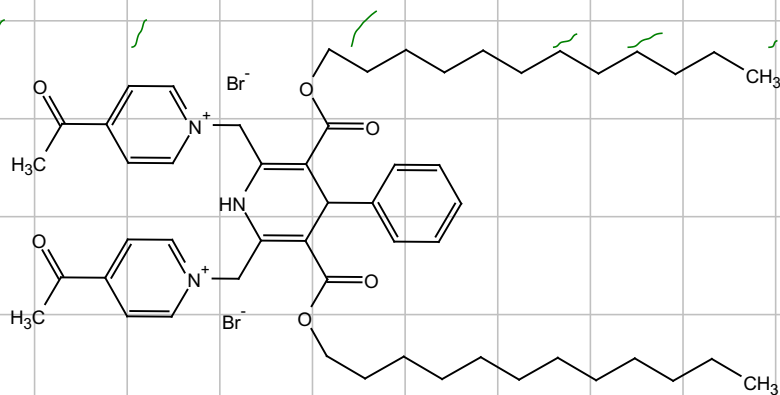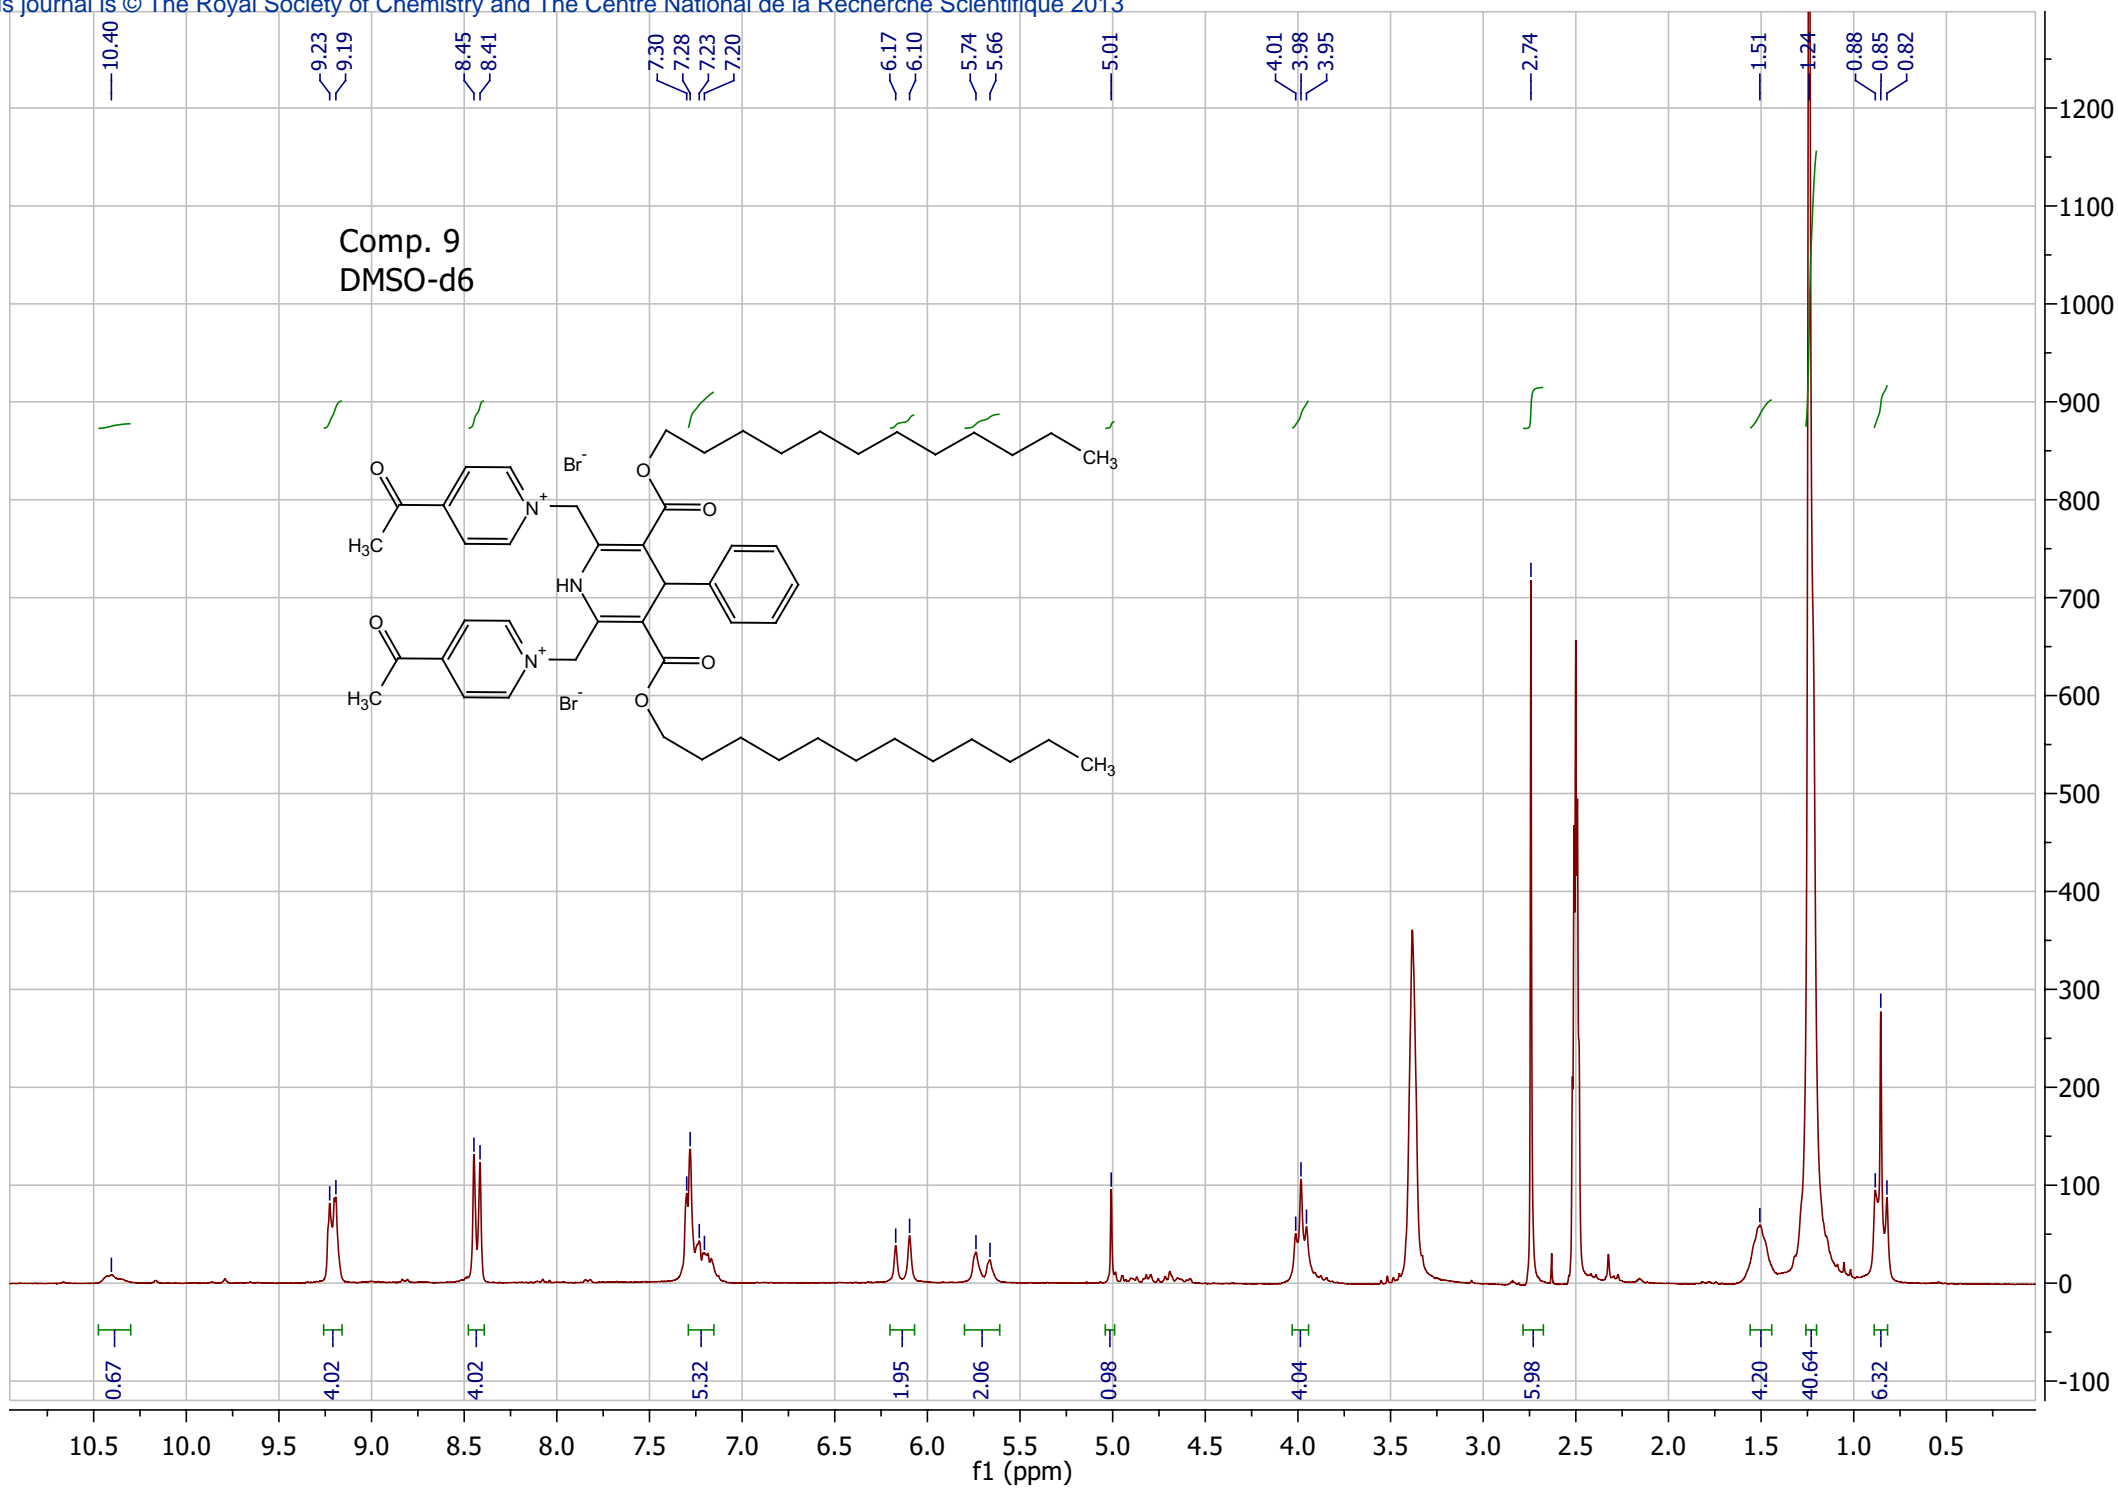

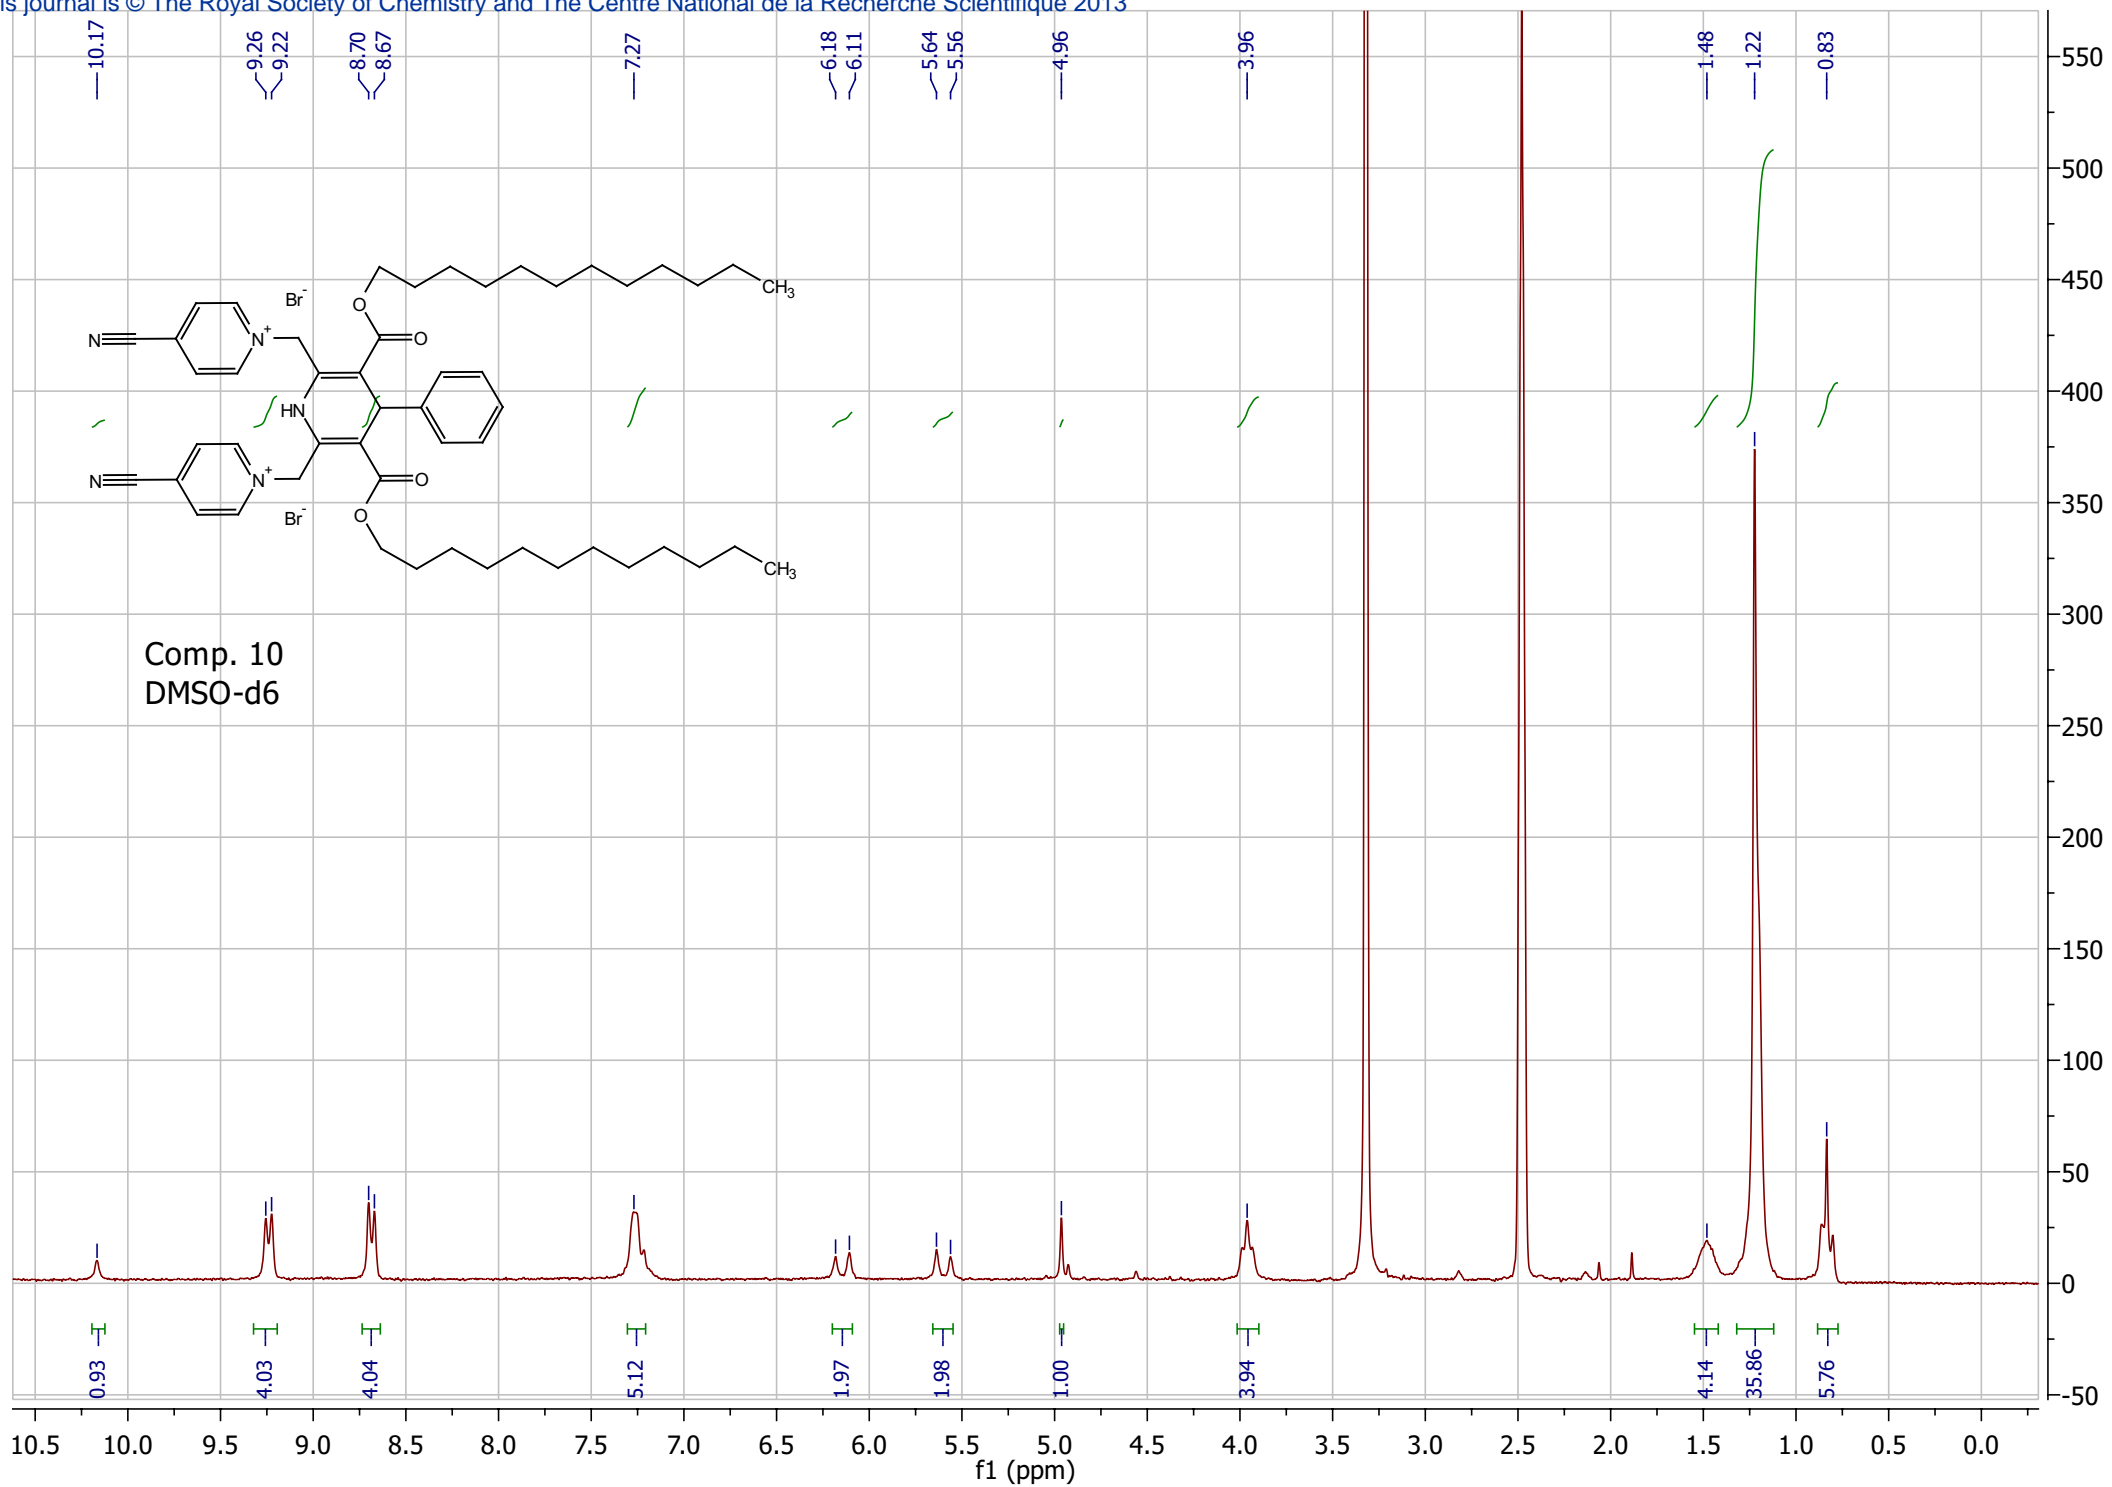

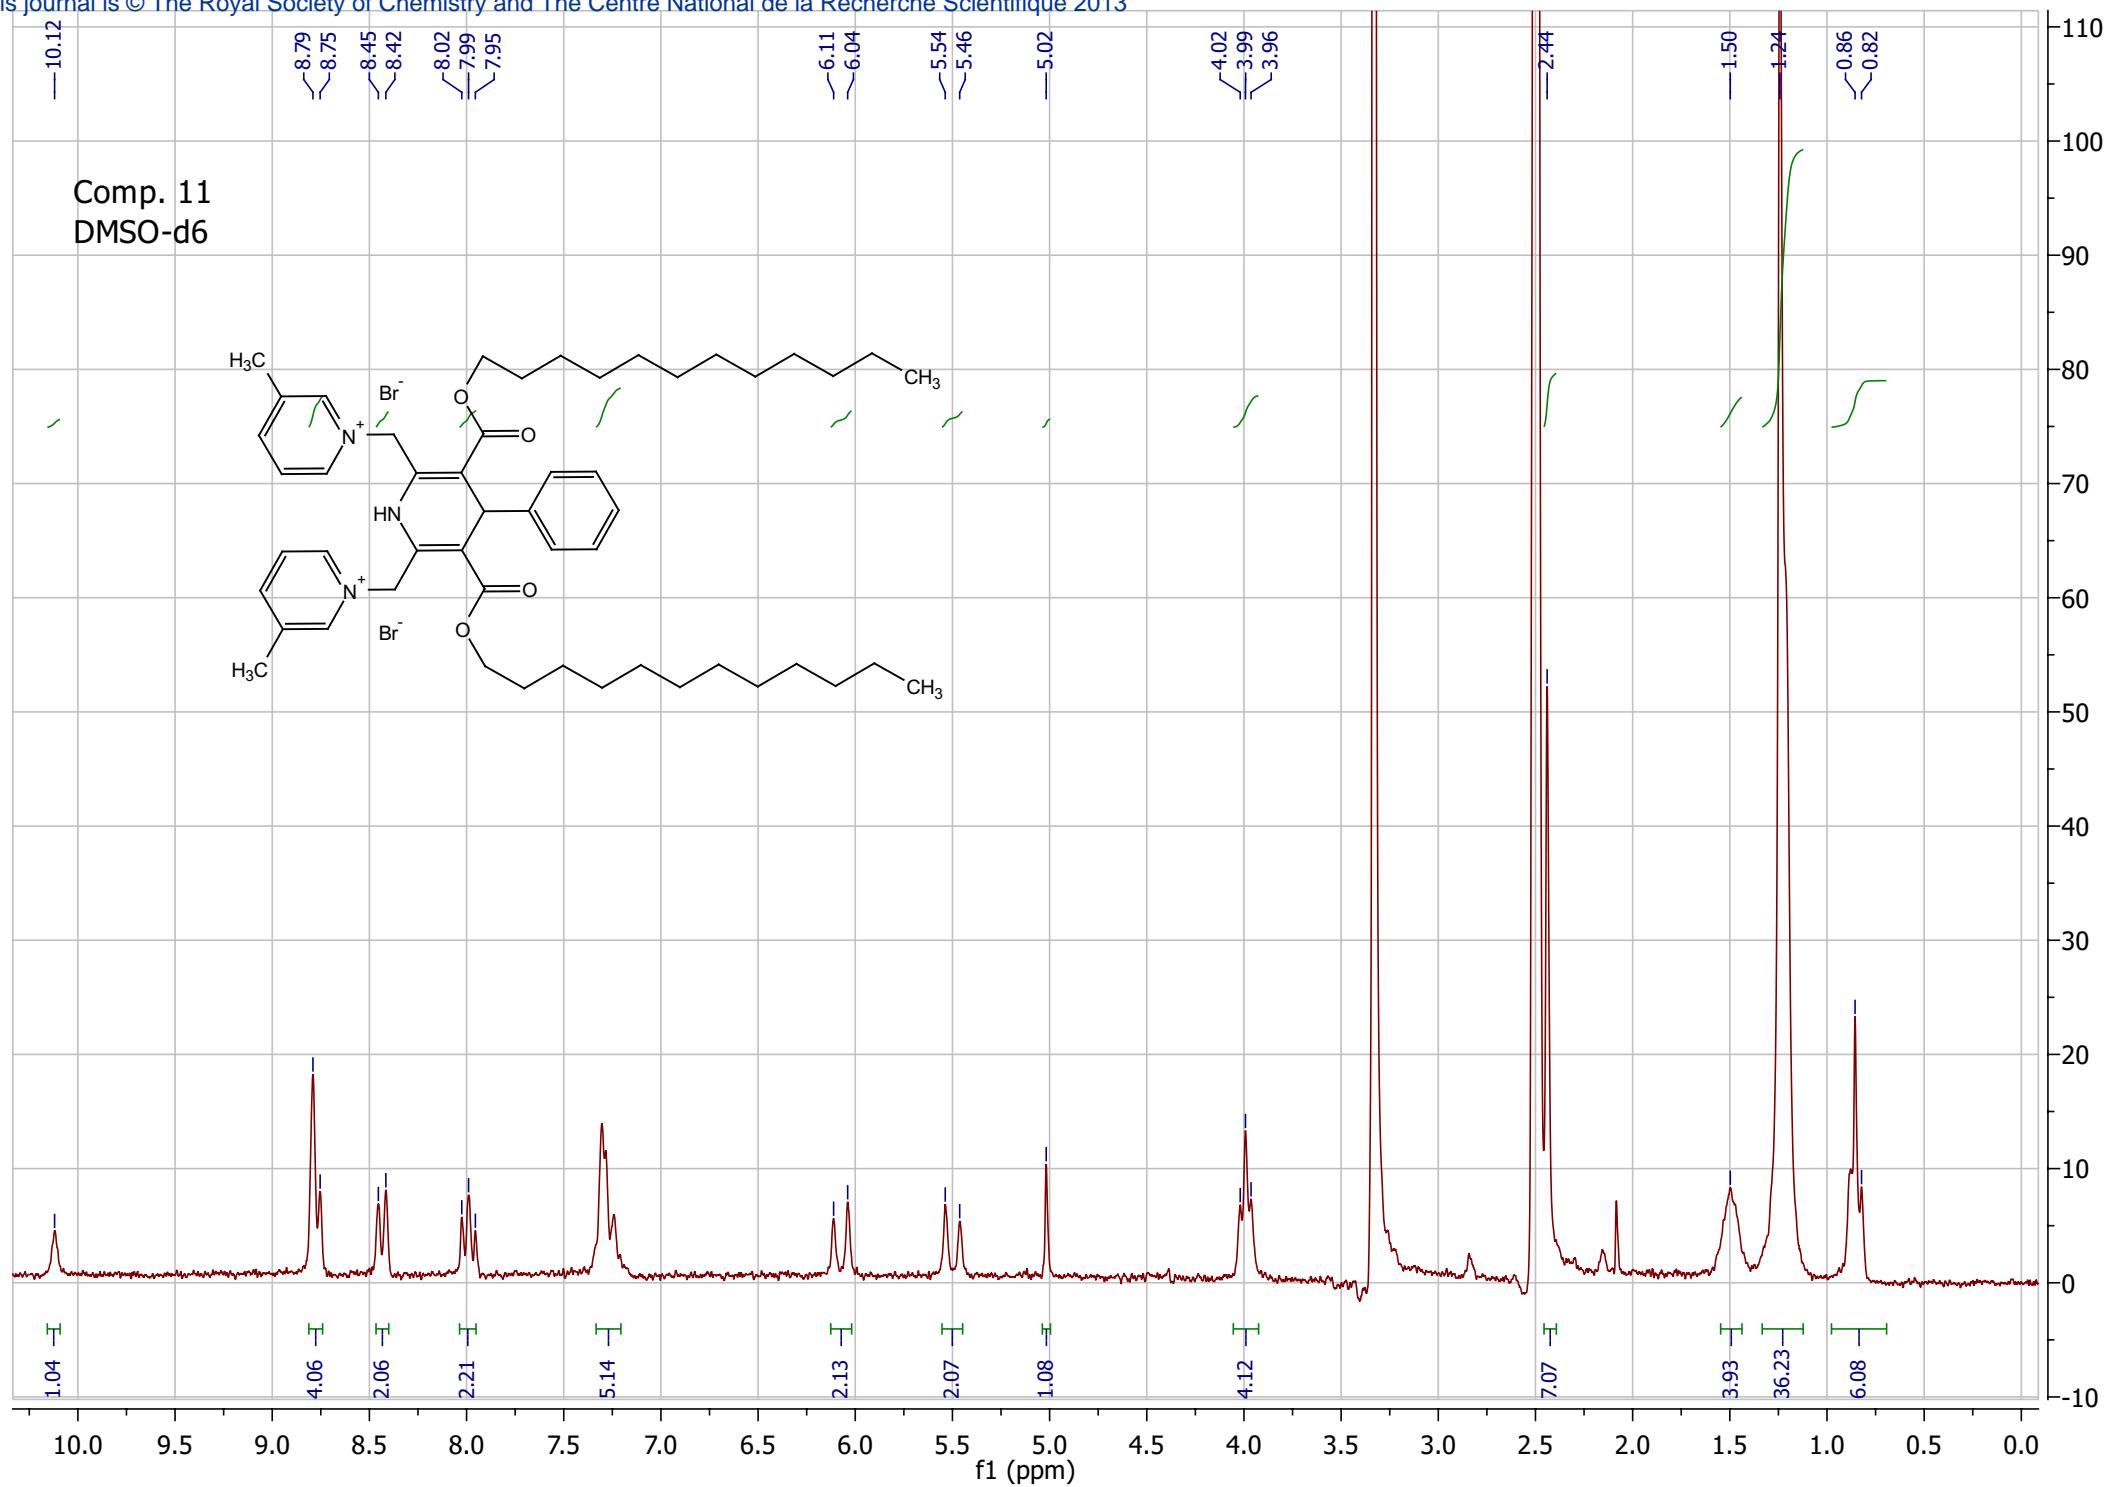



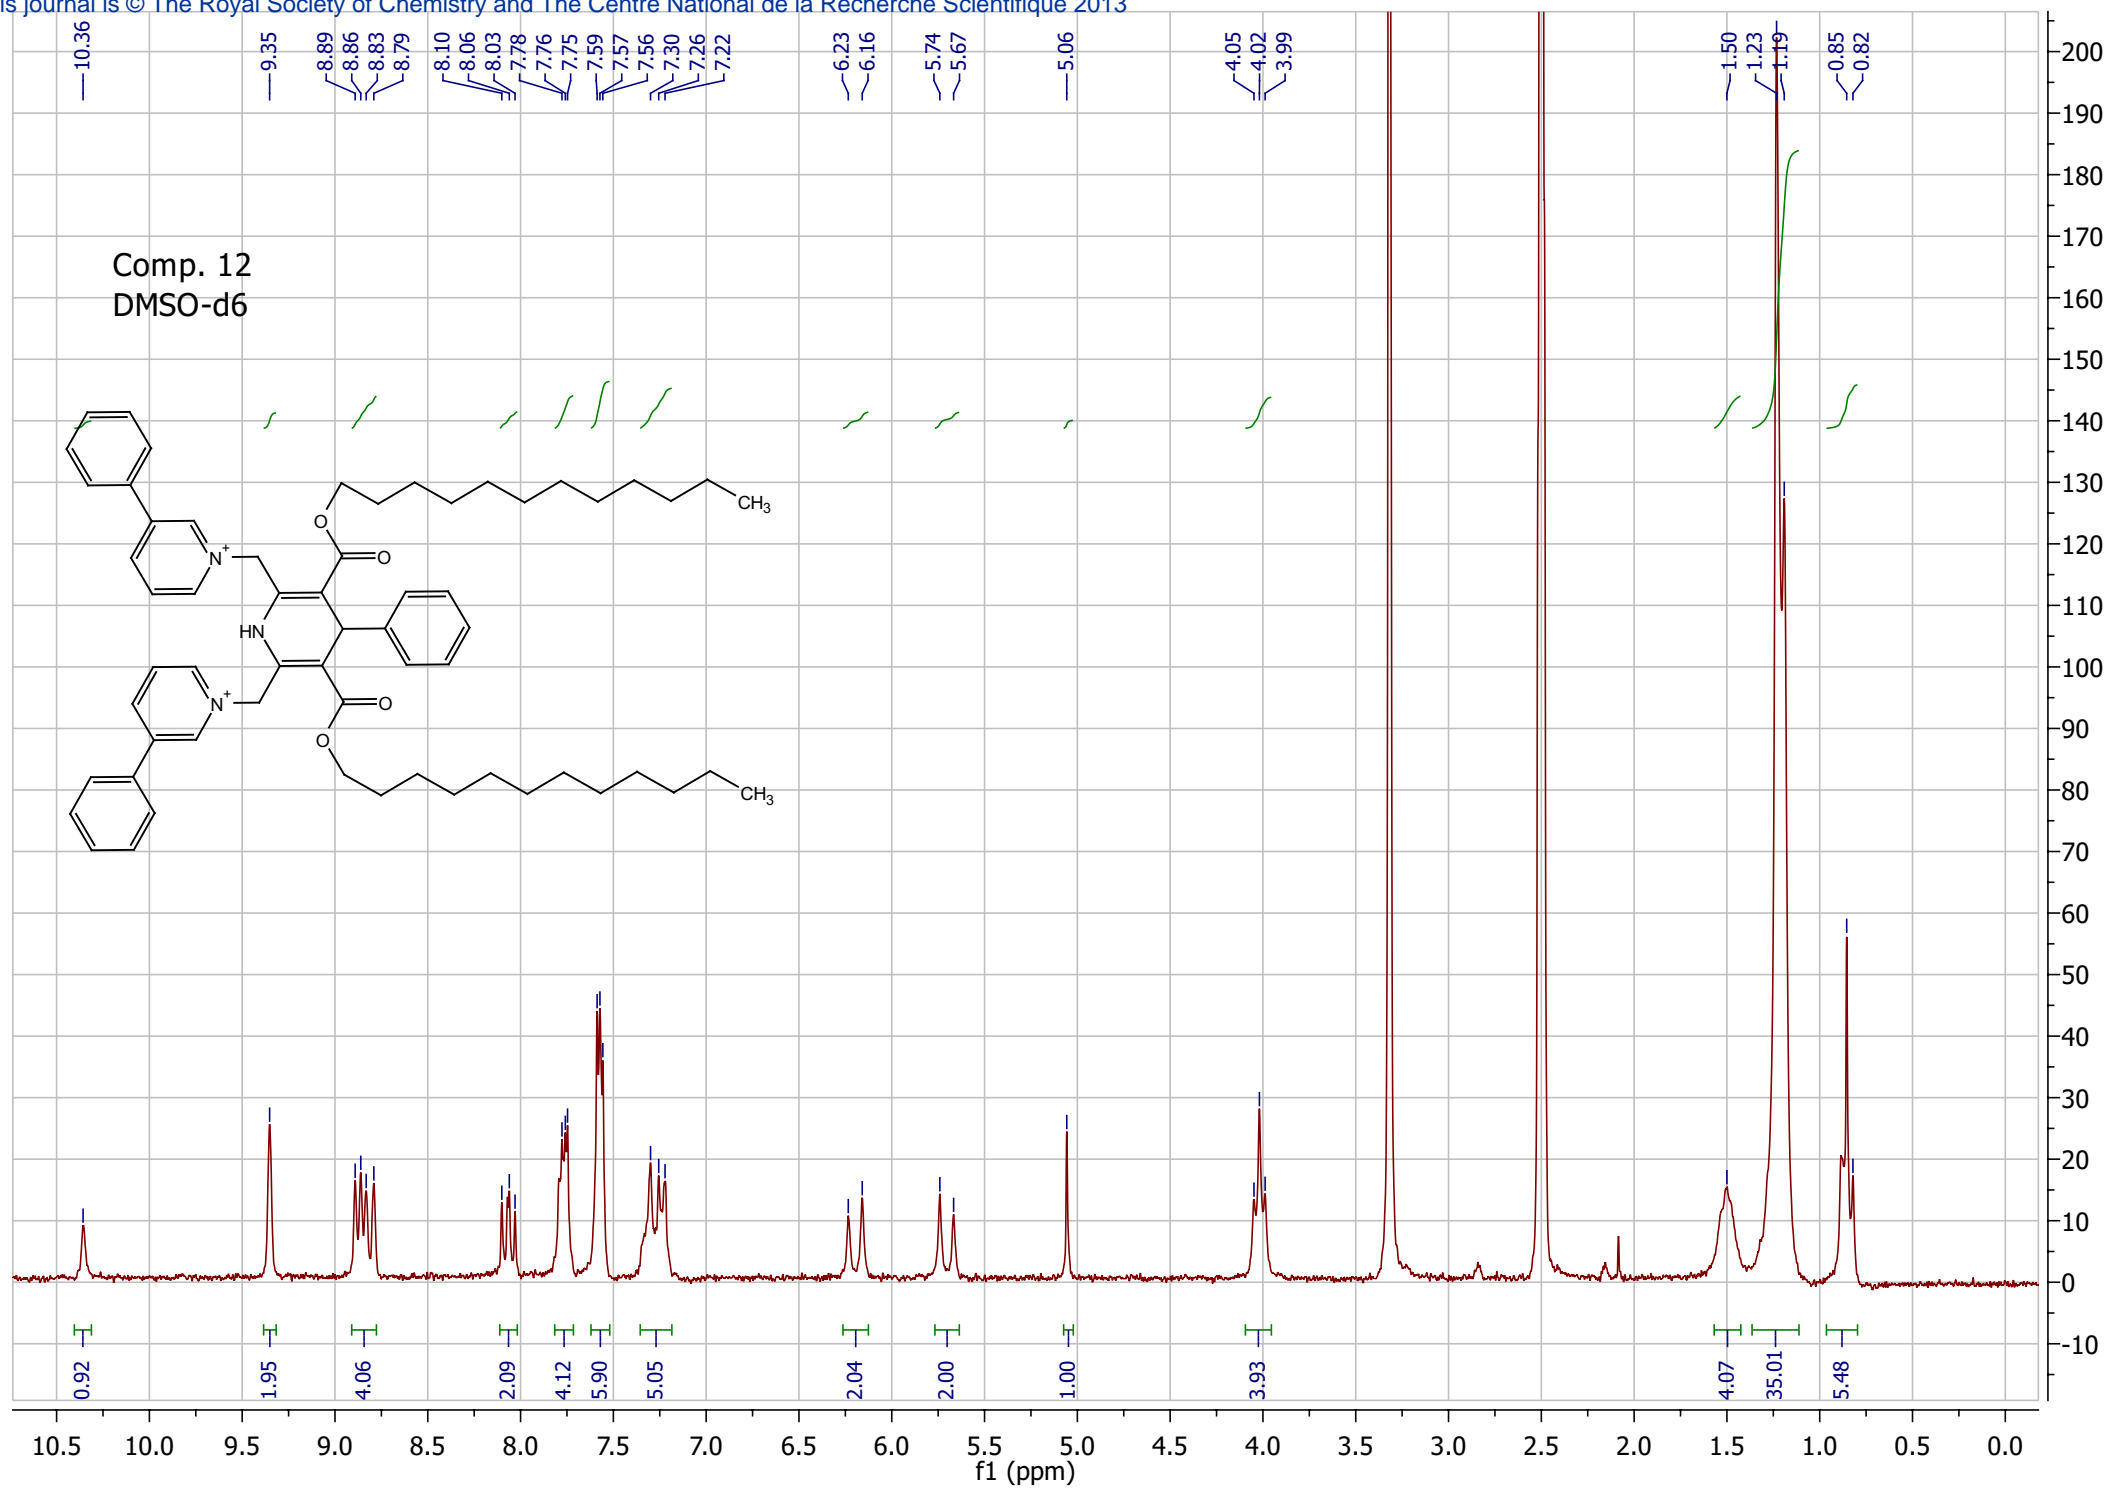

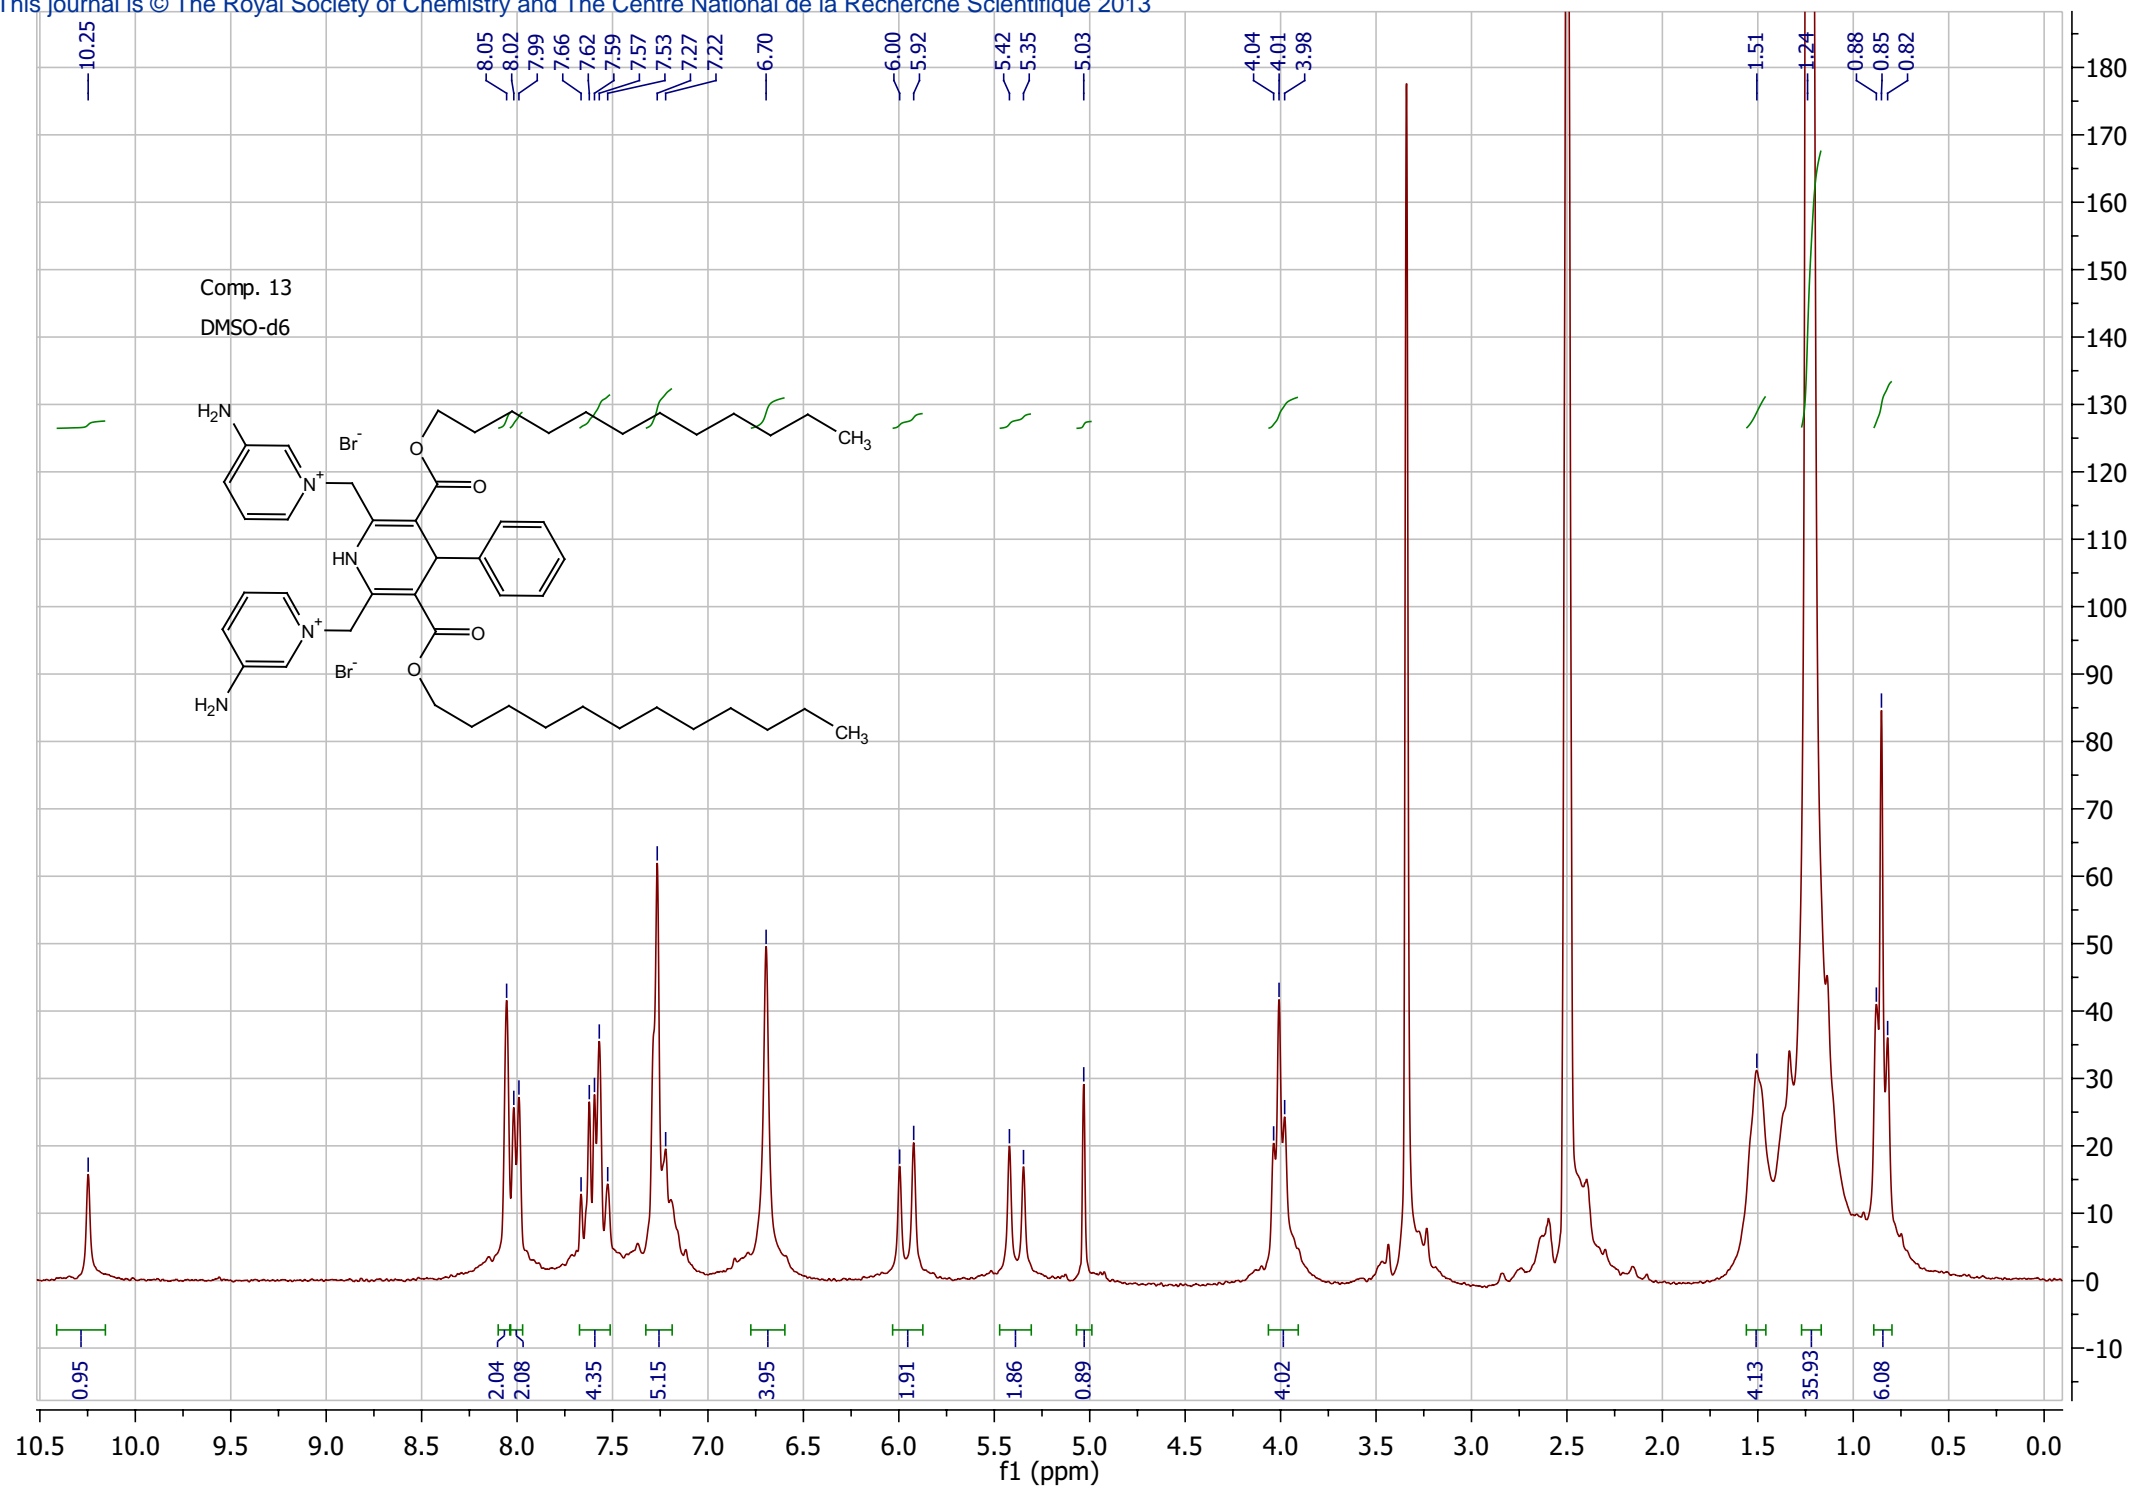

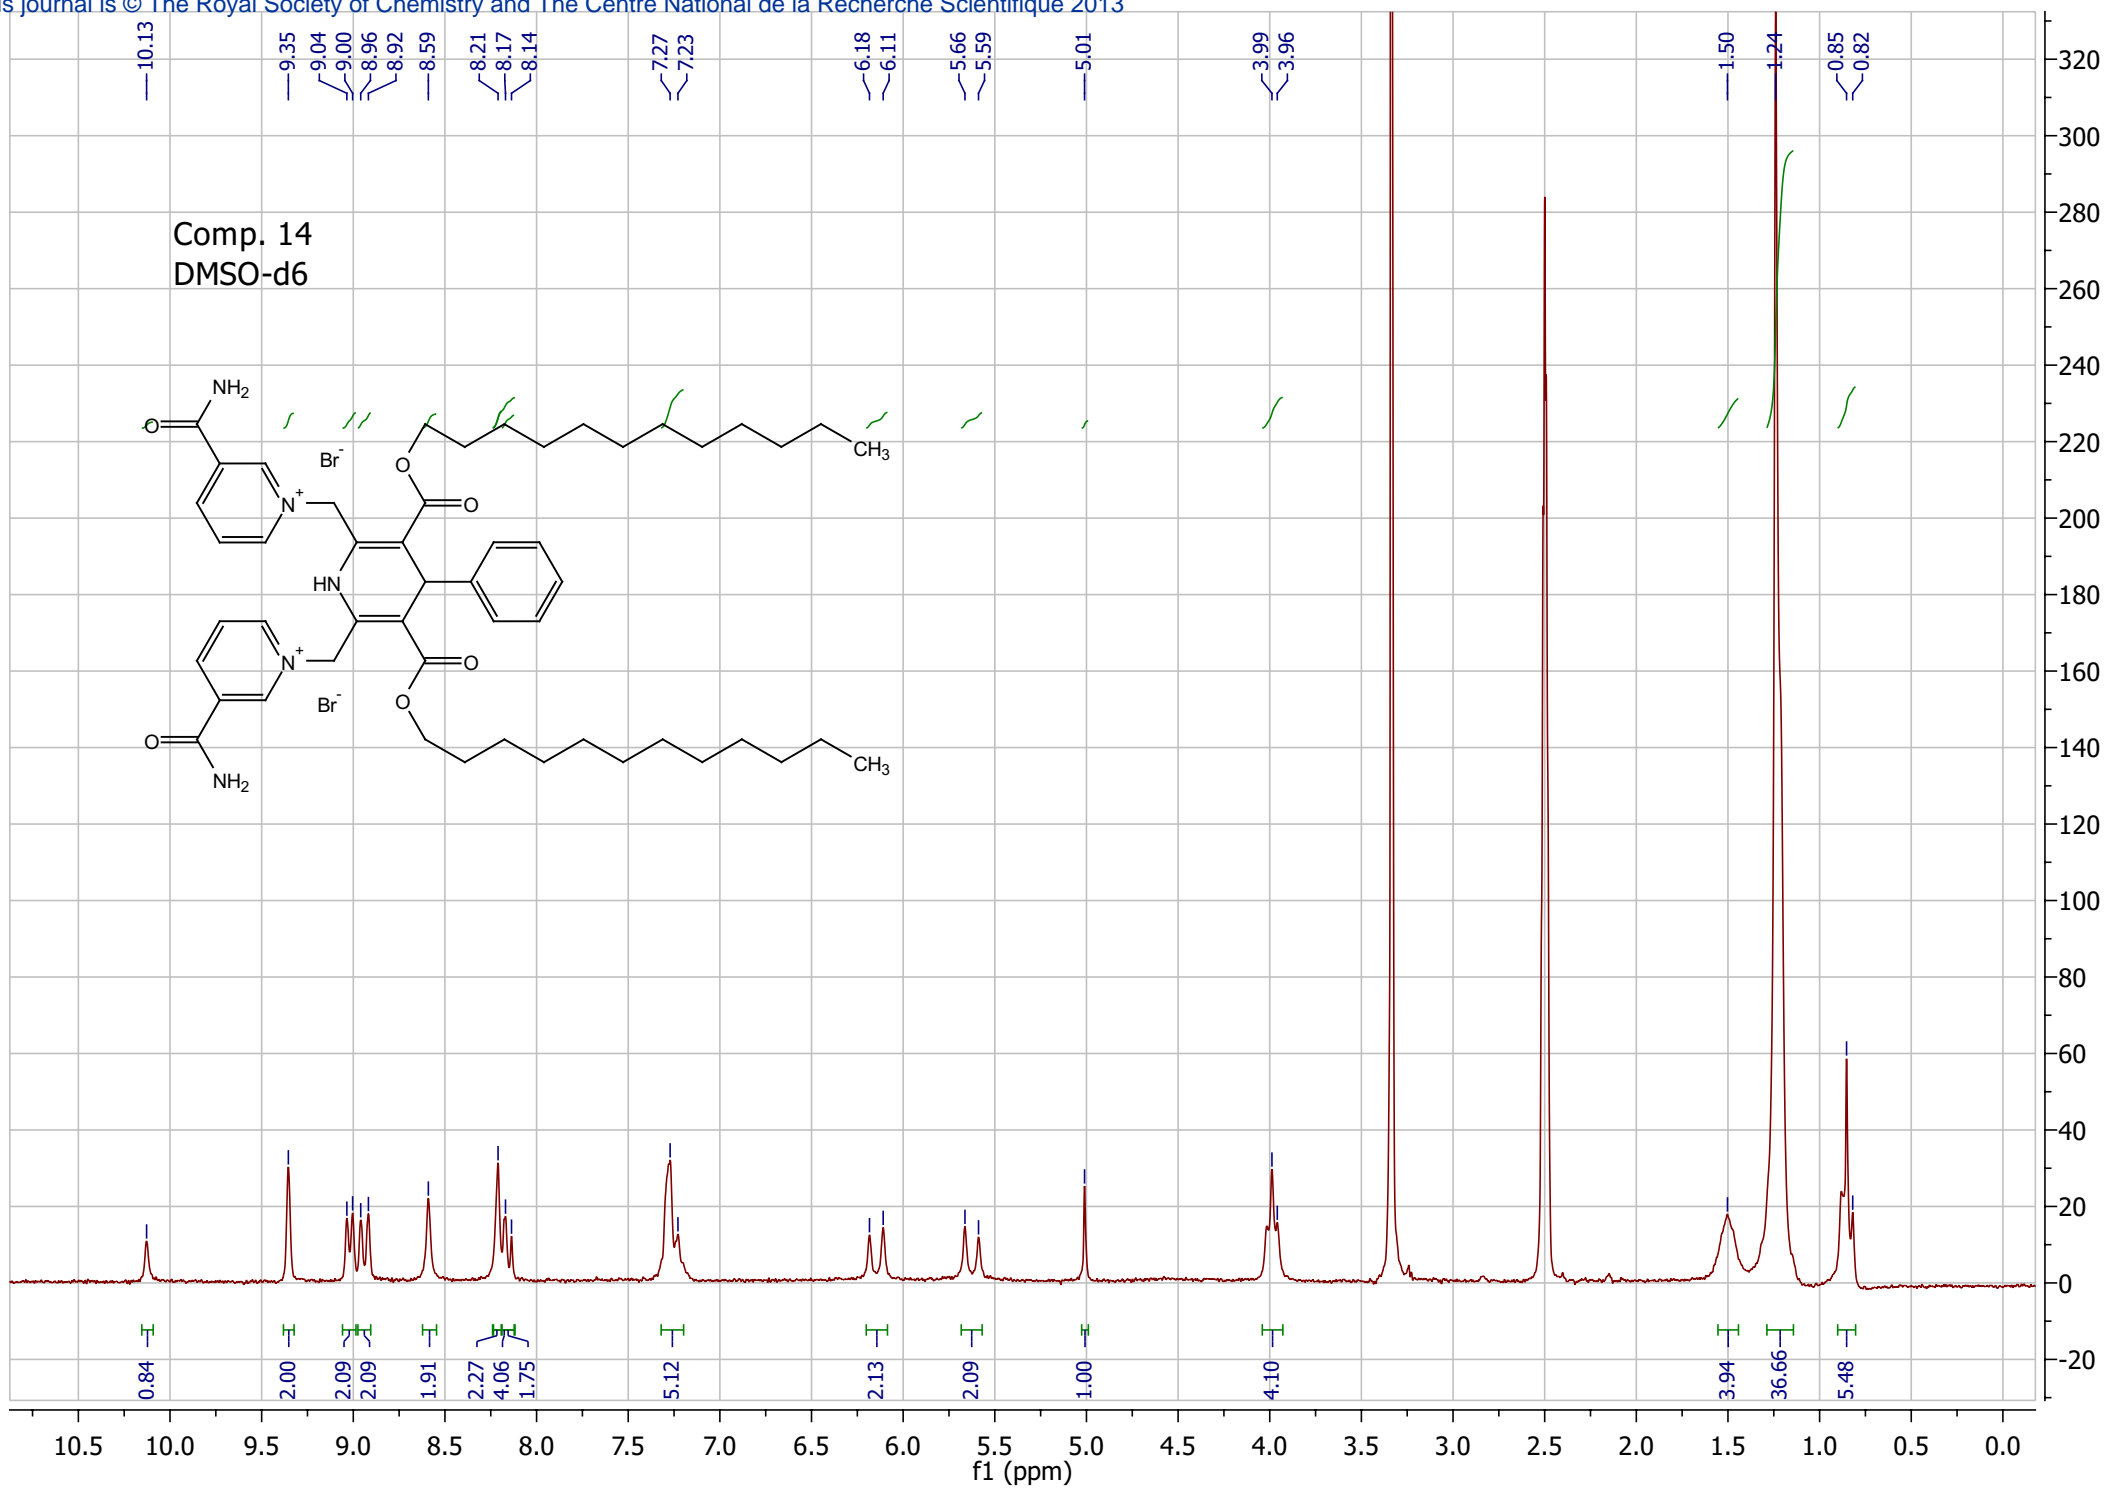

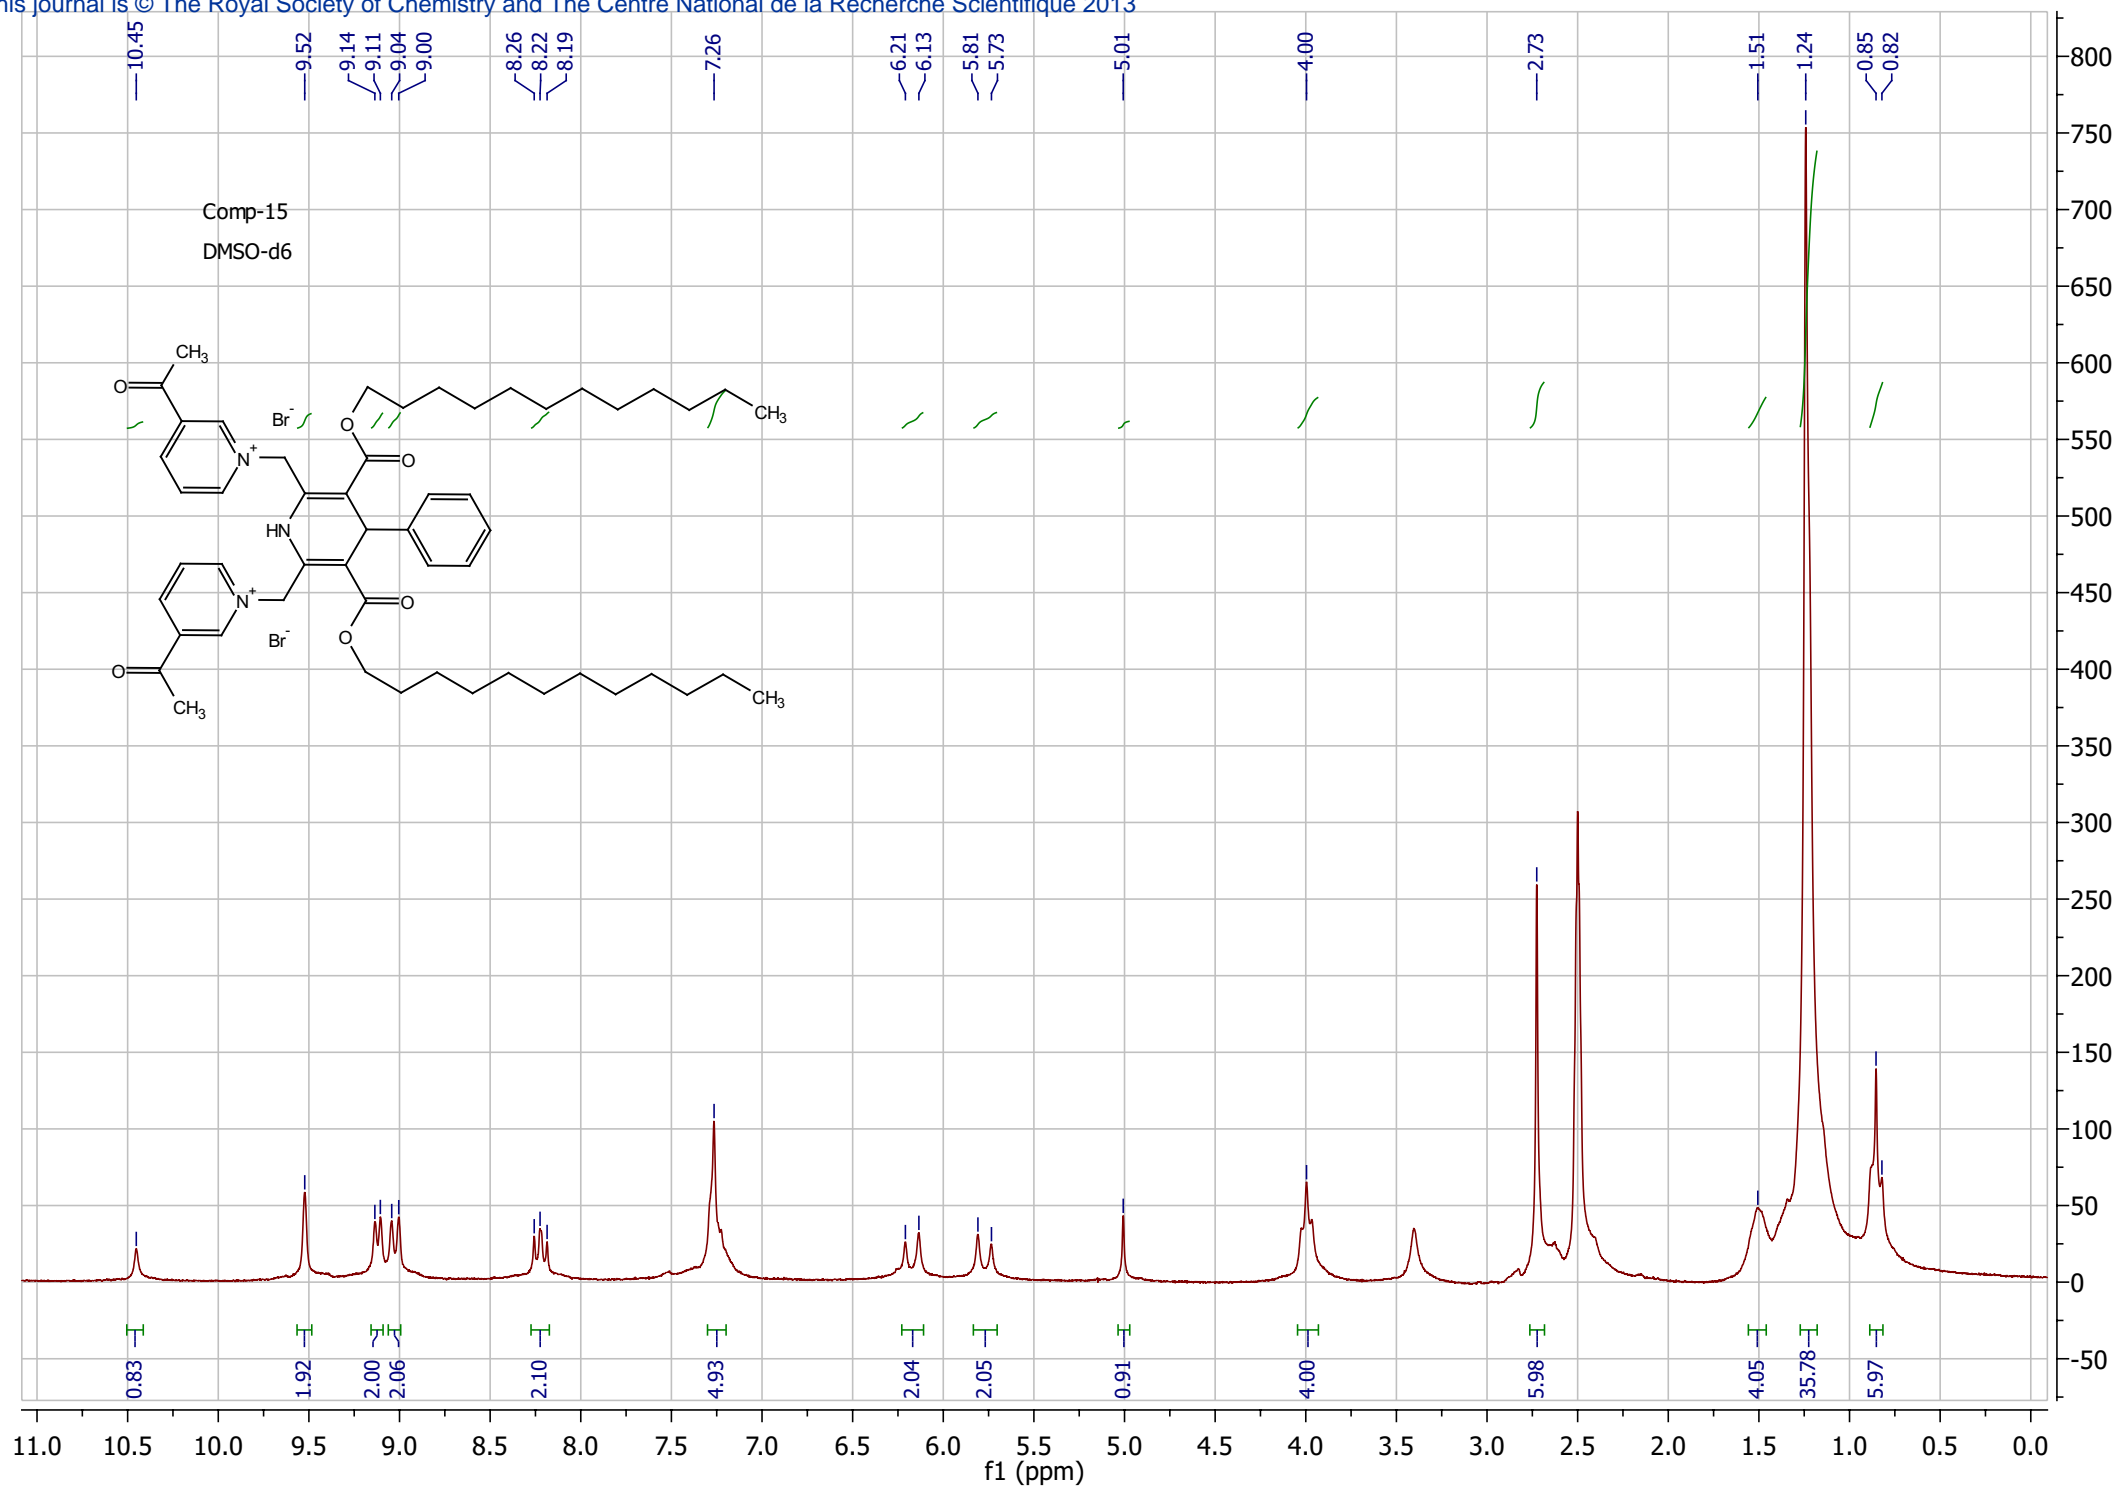

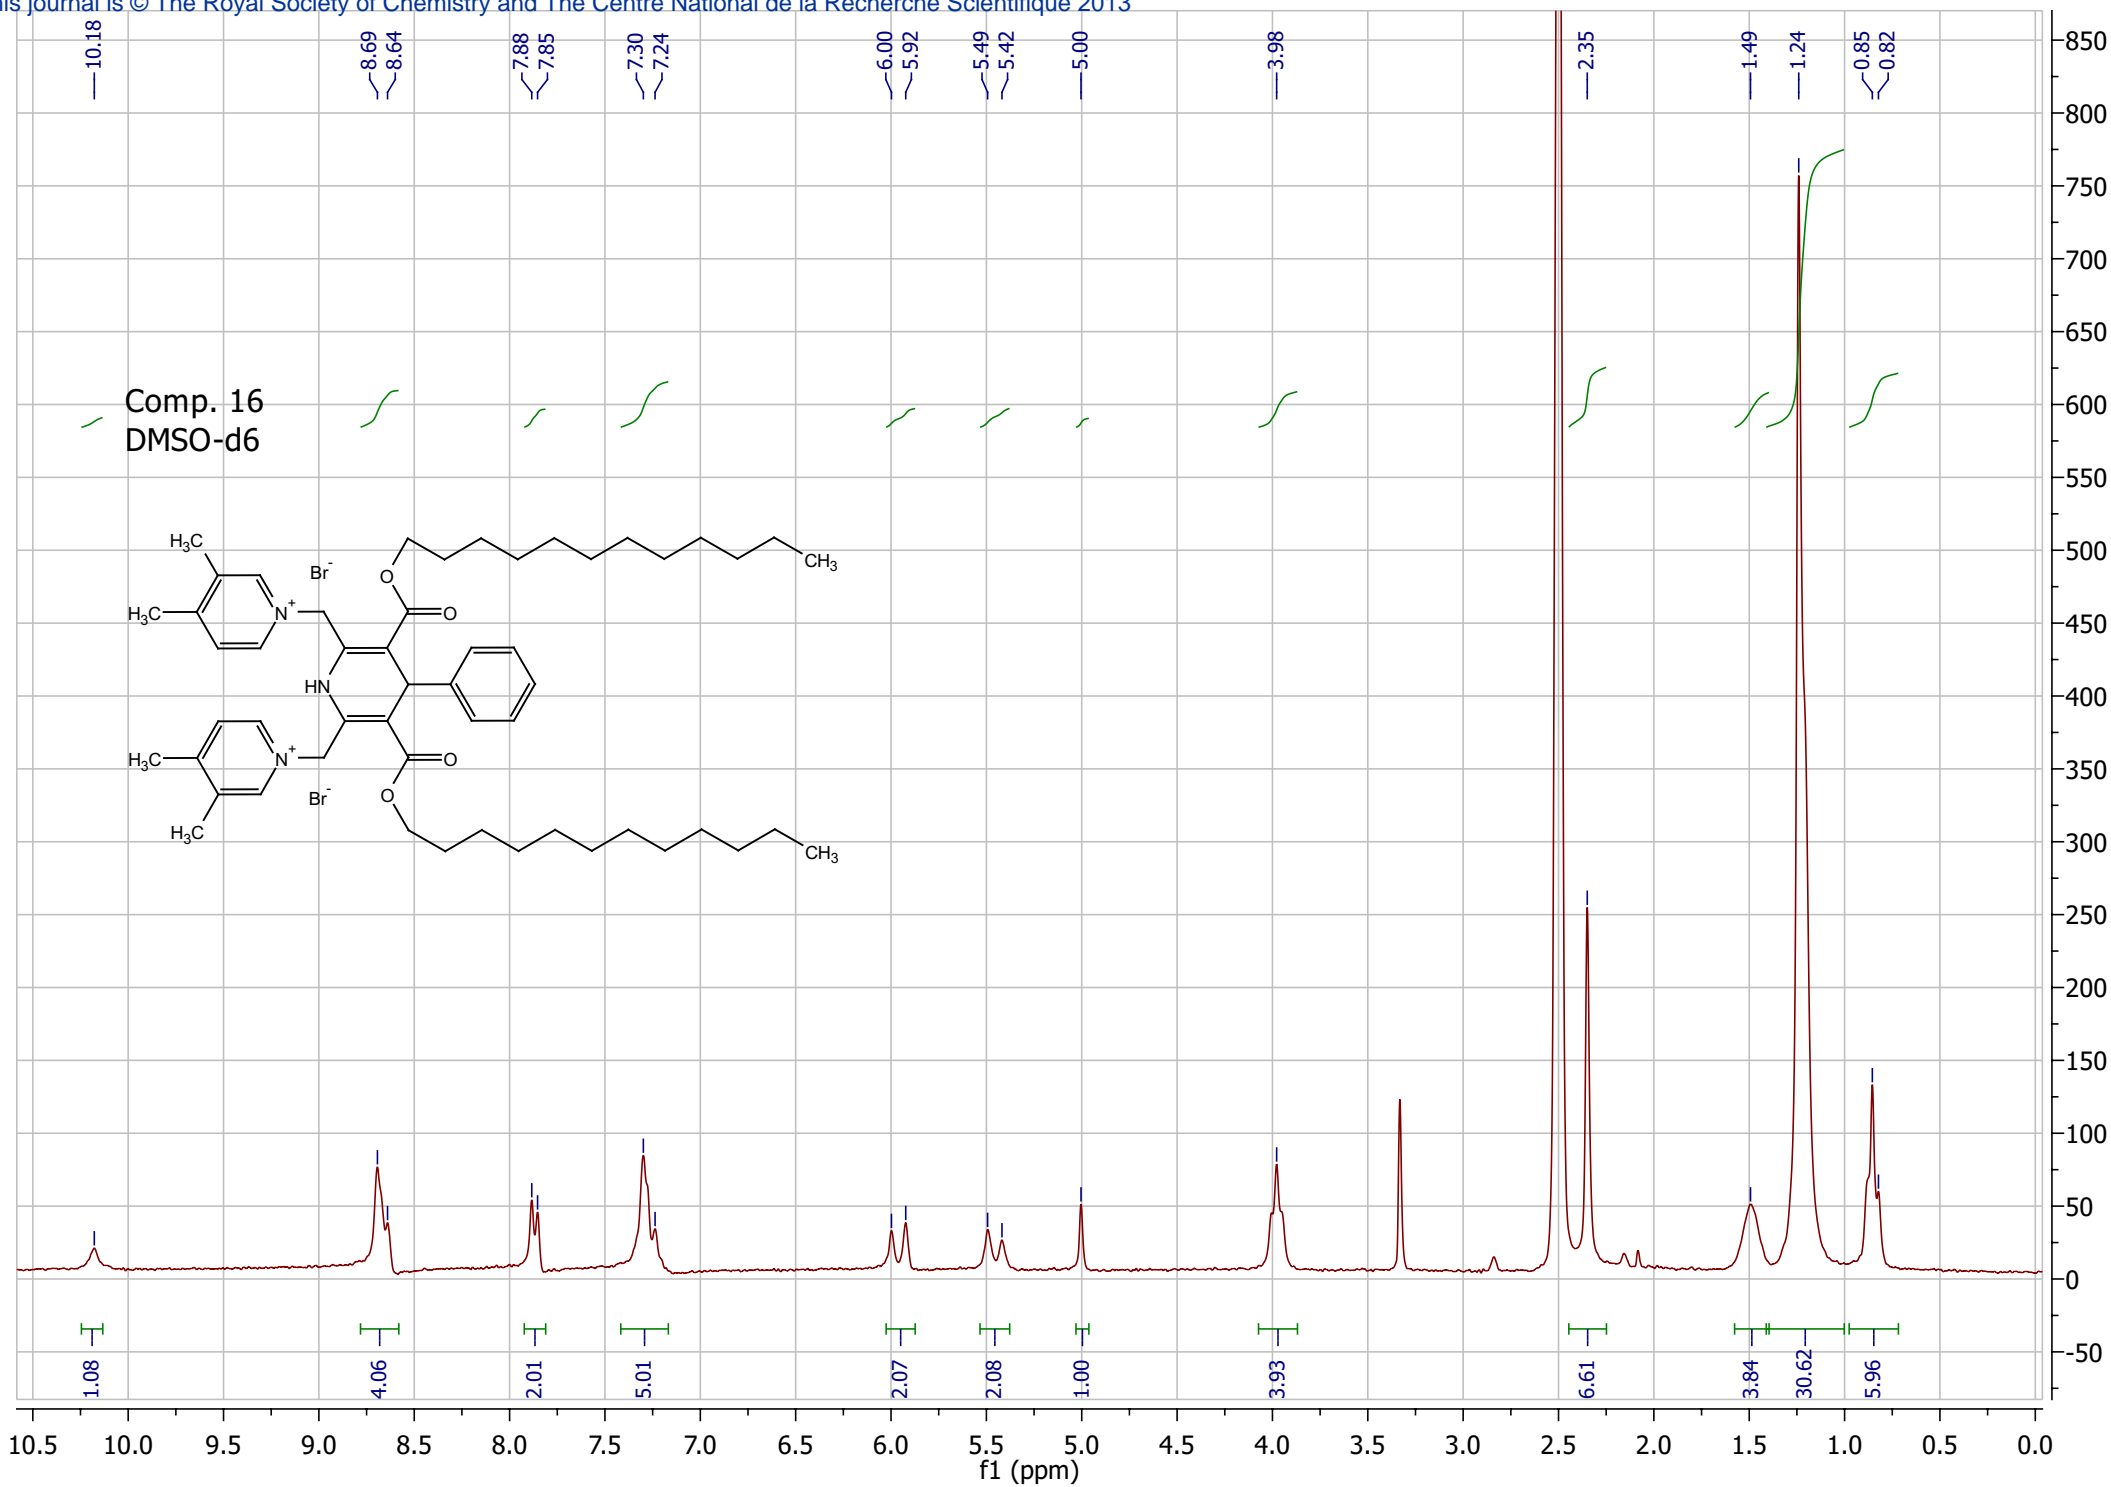

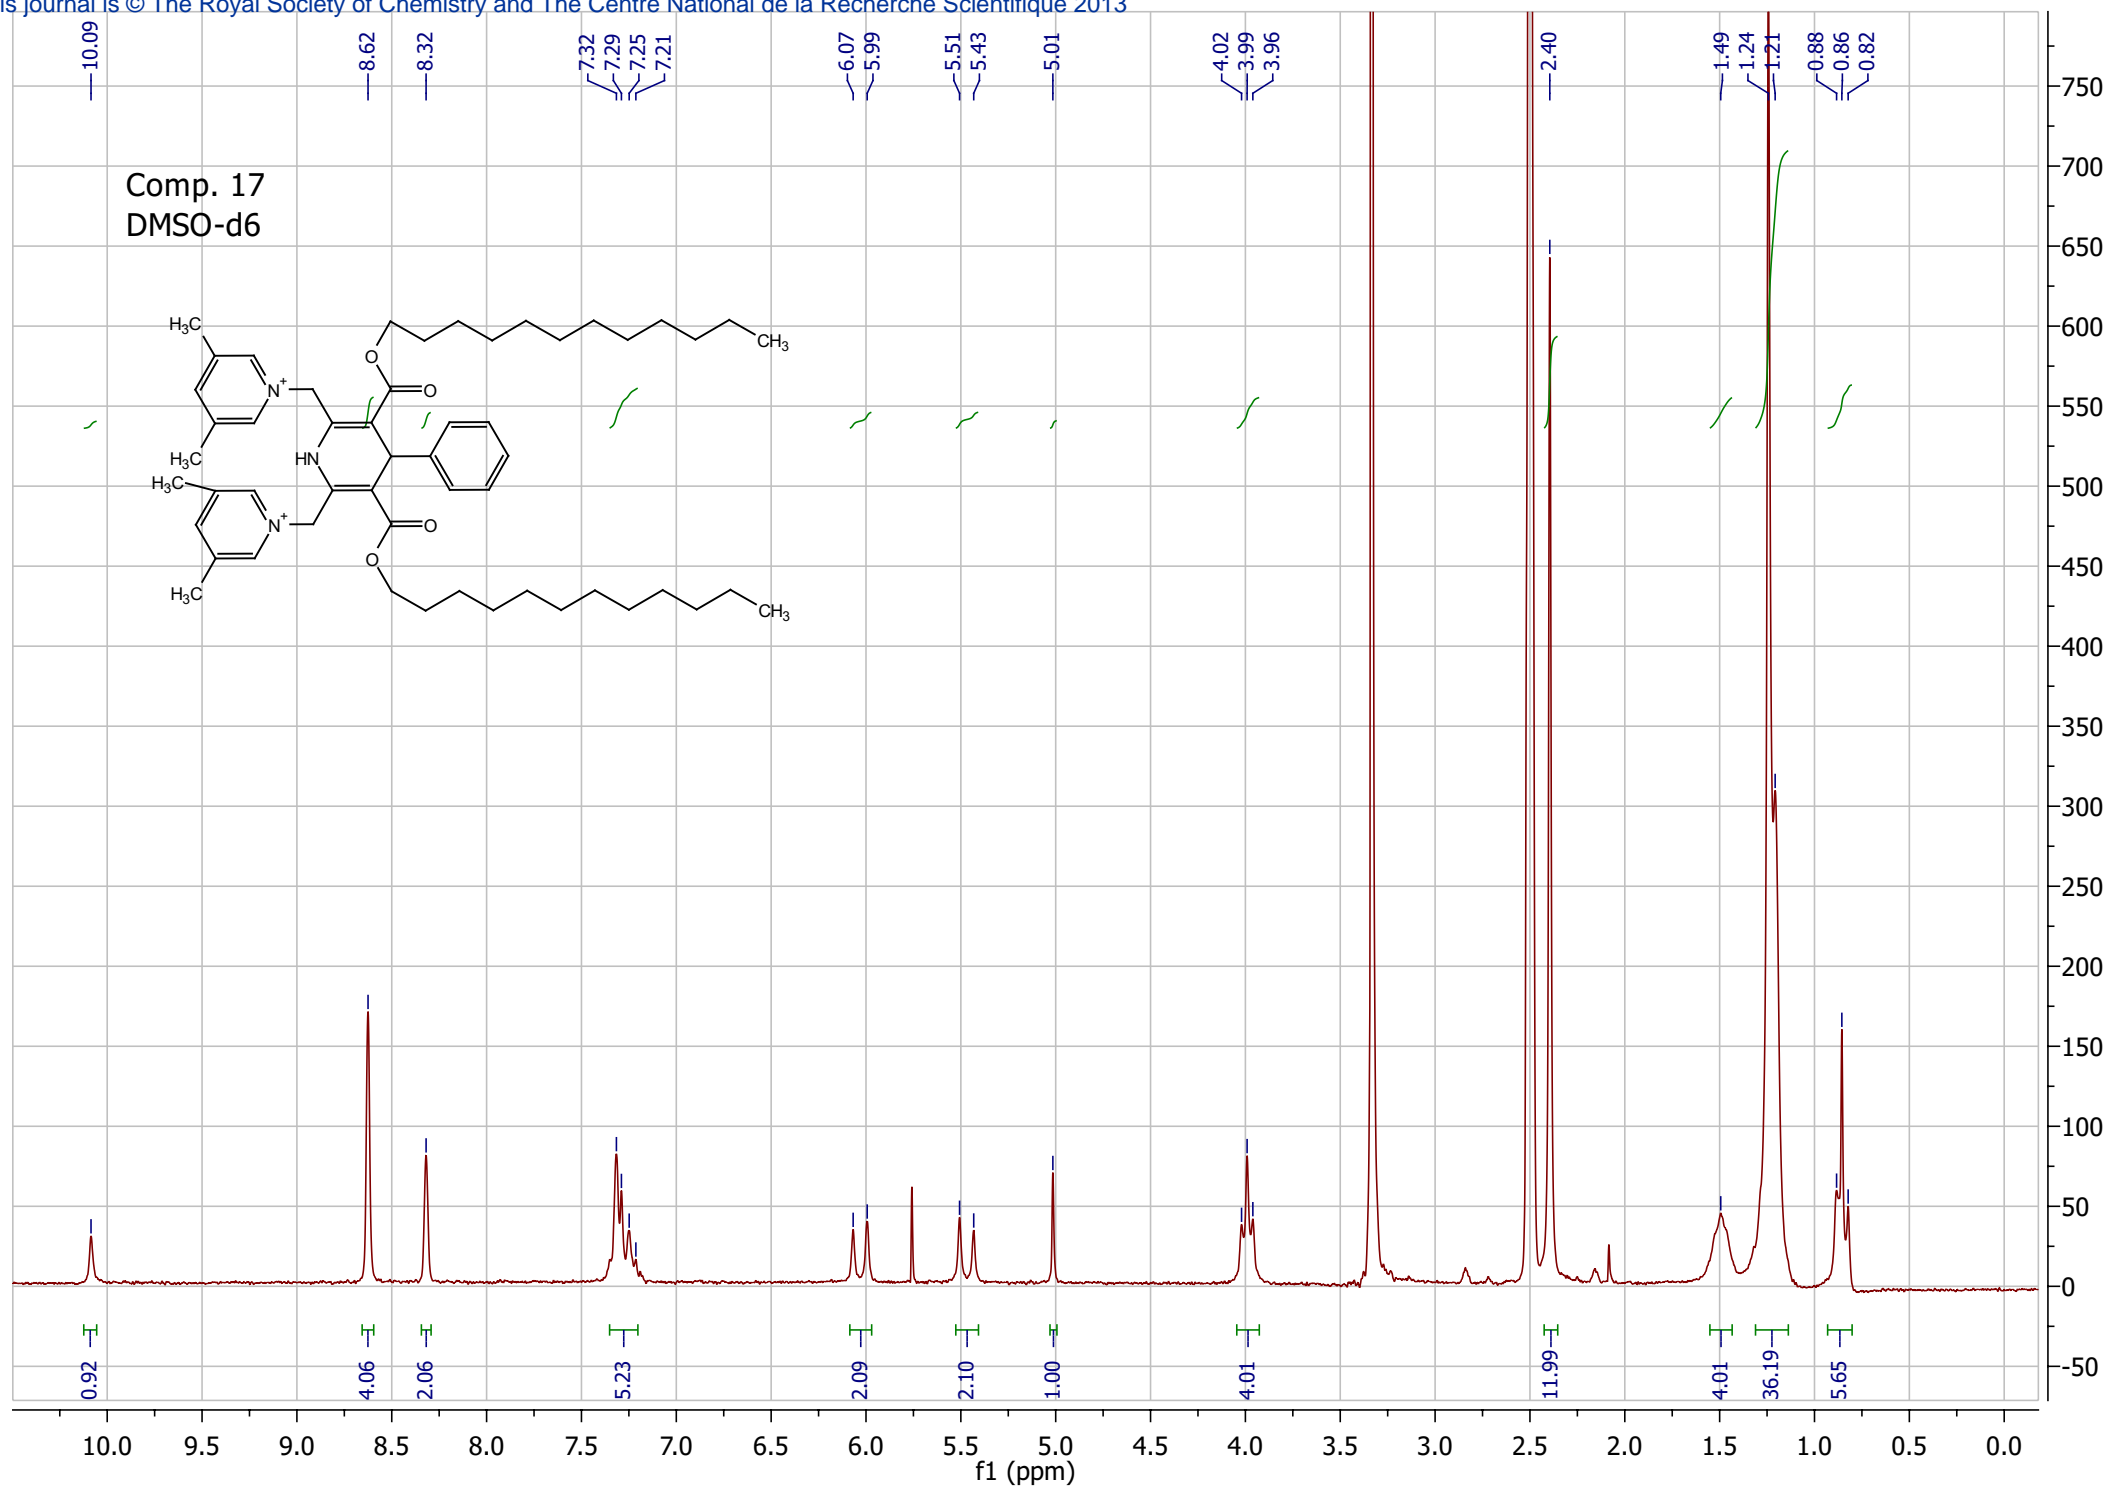

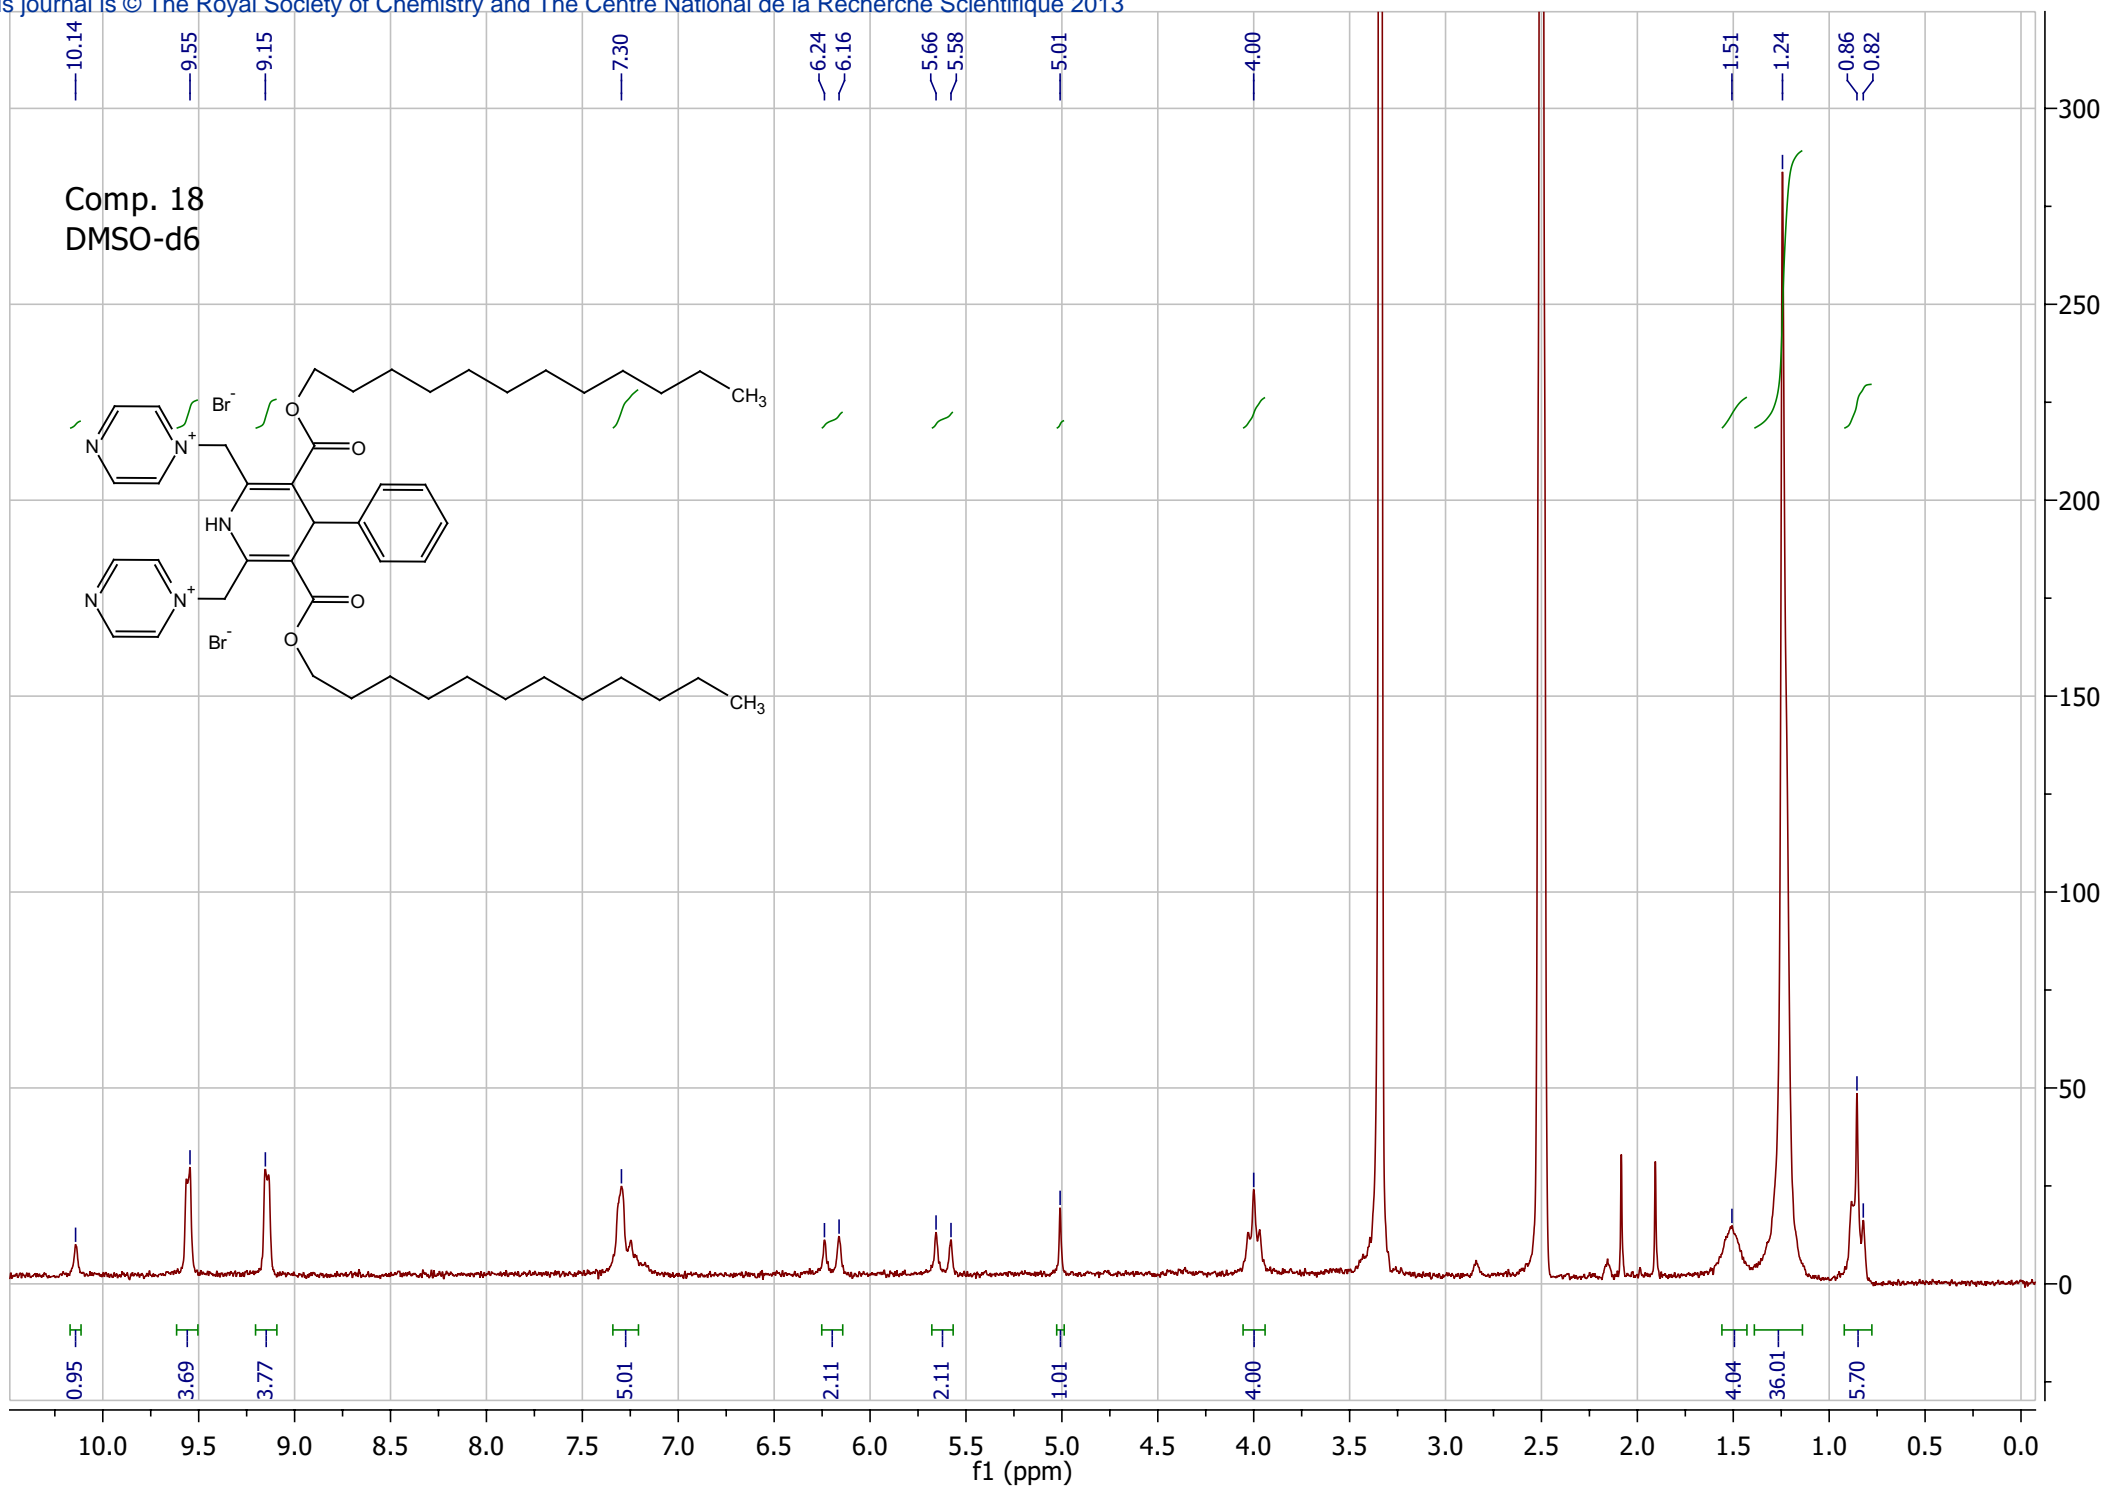

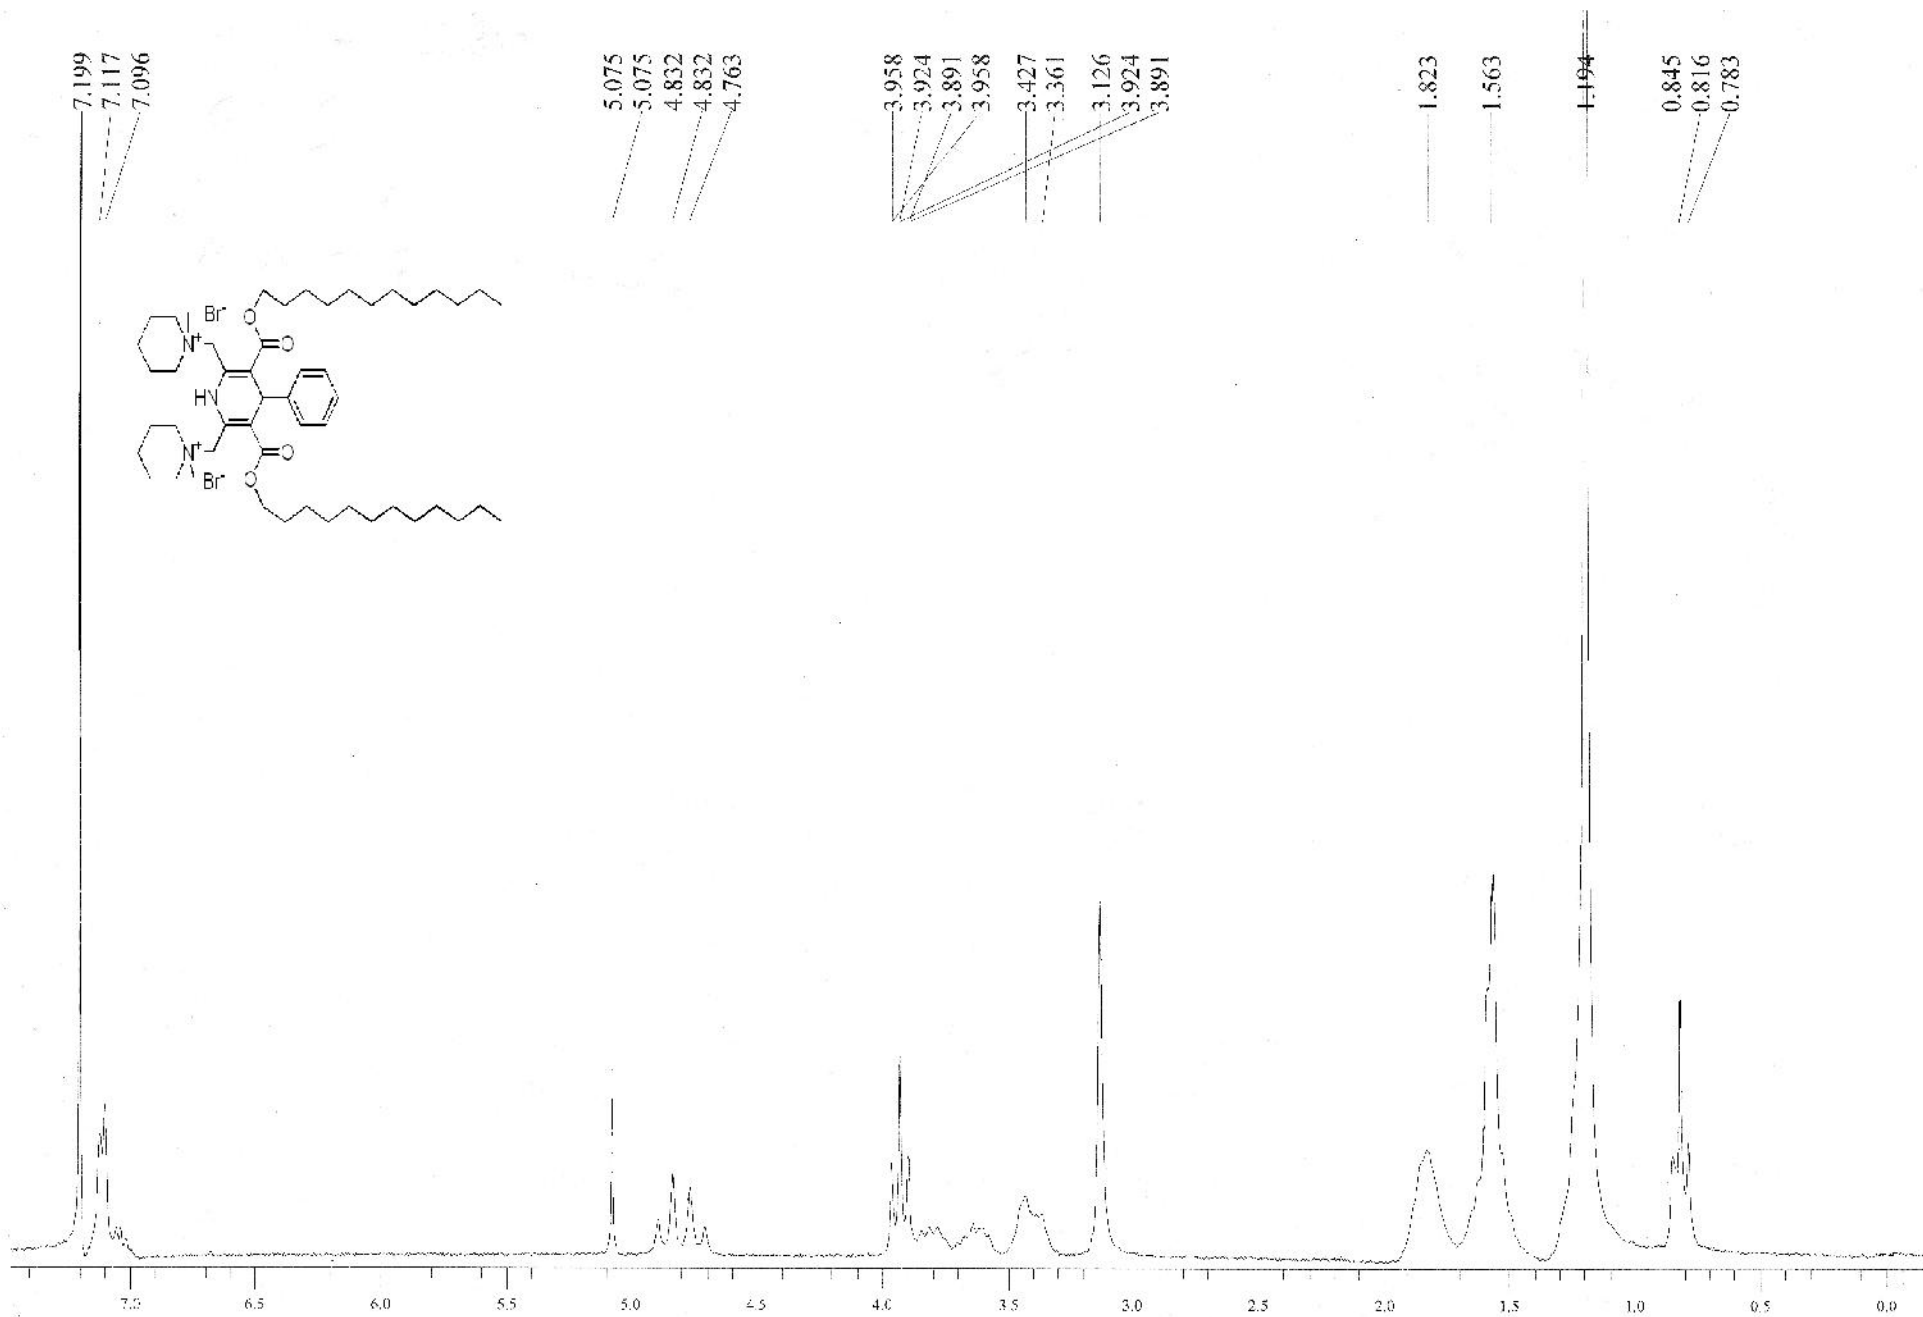



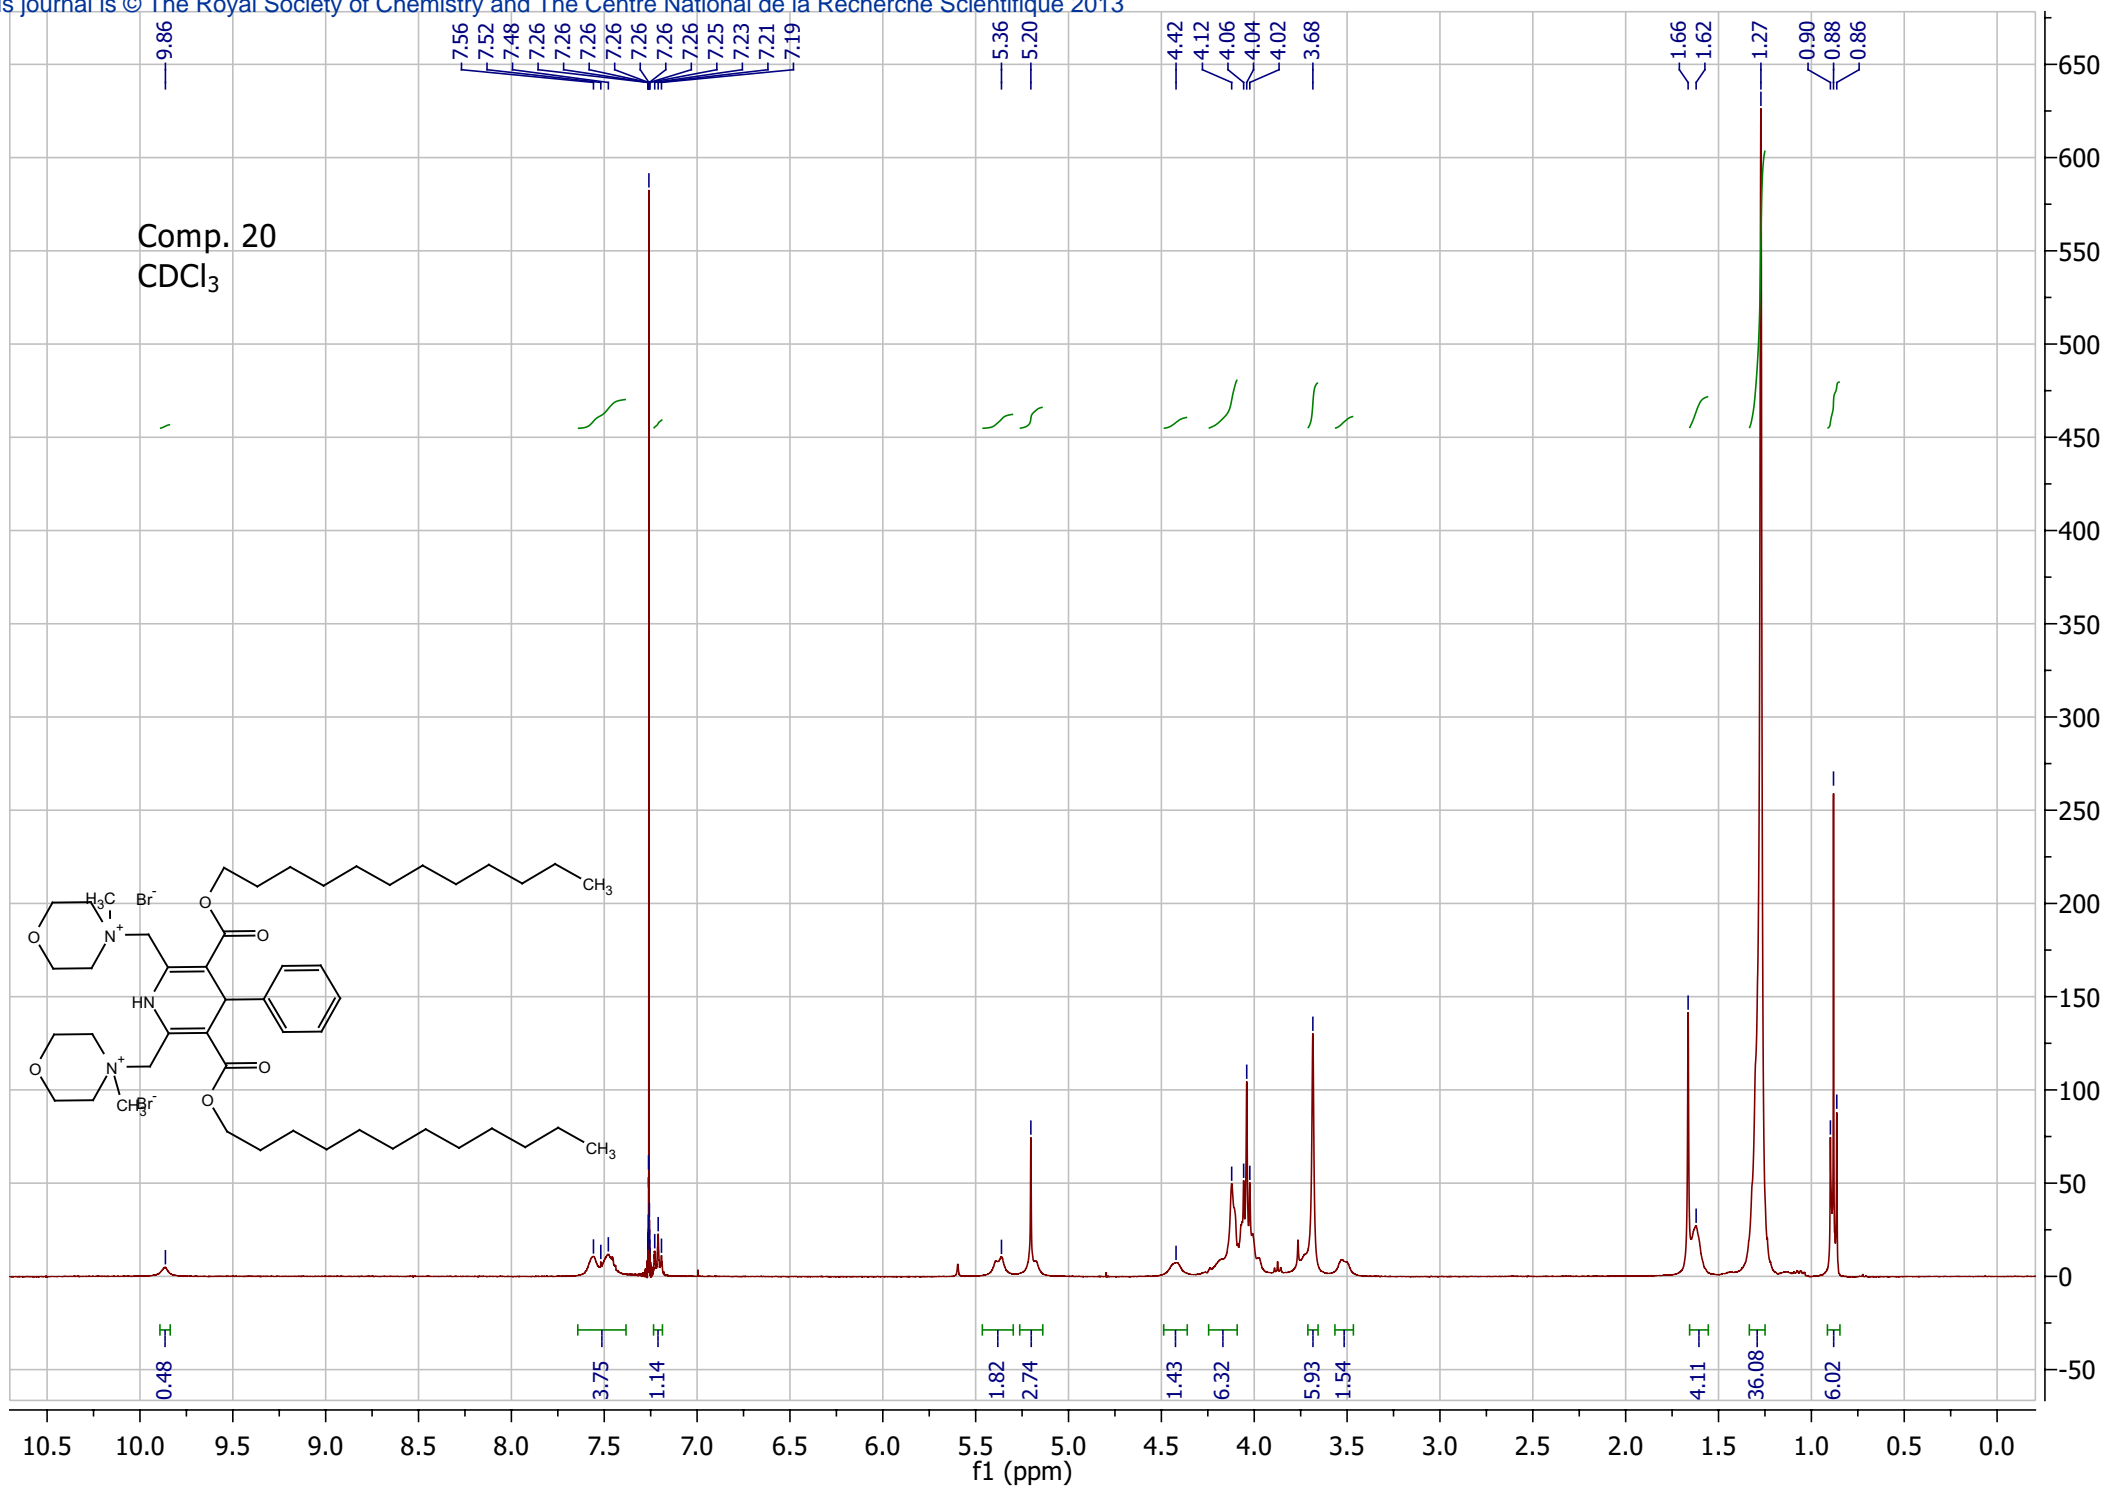

Supplement: c3nj00272a.pdf [file c3nj00272a.pdf]
